# Supplementary material
Source: publisher figshare collection journal article supplement (https://acs.figshare.com/ndownloader/files/6455661)
Supplement: Supplementary file 1 [file 6455661]

## Sheet: S2
Table S2. The list of exosomal proteins from LPS treatment group
Gene Symbol	UniProt Accession	Unique Peptides R1	Unique Peptides R2	Unique Peptides R3	Intensity R1	Intensity R2	Intensity R3
Mfge8	P21956	80	77	57	84774306392	38532103190	112000000000
Ube2v1	Q9CZY3	4	4	4	42288612639	39792778369	29140447550
Slamf7	Q8BHK6	4	3	3	27110904829	53616300351	1166805599
Sh3gl1	Q62419	11	9	8	21990153060	22032065735	21290480335
Apoe	P08226	103	127	60	19614185151	30784534523	8482937405
Hba	P01942	16	18	12	18958941559	2551992648	7.96248e+08
Cltc	Q68FD5	178	171	126	15829732257	5642566054	2478280160
Hspa8	P63017	52	52	42	15424513295	1258555179	2201887925
Ahcyl2	Q68FL4	4	3	2	14983749032	13428396416	8164549267
Alb	P07724	4	4	4	14100440022	7144165012	7.6472e+08
G6pdx	Q00612	26	21	11	10954658963	11247841712	2012475369
Flna	Q8BTM8	94	110	78	10749873905	1129975752	5327584831
Nme1	P15532	2	2	2	9945159303	3.08306e+08	3.76658e+08
Pdcd6ip	Q9WU78	90	80	72	9347888607	6.90465e+08	4362125516
Actb	P60710	23	26	18	7778980426	5058601453	4230148221
Cd36	Q08857	36	28	21	6088198393	3.98833e+08	1762804276
Hbb-b1	P02088	21	14	11	5611760155	158009590	1.09401e+08
Vasp	P70460	10	12	8	5301334190	3.27552e+08	2.23511e+08
Ezr	P26040	4	4	2	5225369772	1.02139e+08	1239214983
Wasf2	Q8BH43	6	5	6	5224137229	3.89163e+08	2.21e+08
Qsox1	Q8BND5	2	2	2	5069338770	1.72871e+08	1.3521e+07
Anpep	P97449	72	54	54	4967028144	822691606	2720060549
Lpl	P11152	29	30	19	4930529589	2810405249	8.8923e+08
Gsn	P13020	14	16	11	4602449848	2659177256	1038223855
Sdcbp	O08992	25	25	22	4276520005	5.53823e+08	2782758949
Hist1h4a	P62806	31	32	20	4190518626	5.2503e+08	9.14219e+08
Eef1a1	P10126	44	51	28	3816915162	1831034039	1539282434
Rps27a	P62983	18	18	12	3798229925	5.15031e+08	3224285153
Vps28	Q9D1C8	14	11	8	3374554040	3.74802e+07	4.55617e+08
Mmp12	P34960	40	37	26	3341121176	1933351268	2.82404e+08
Hnrnpu	Q8VEK3	24	32	20	3319981293	2969151816	3080481960
Vcp	Q01853	80	61	56	3119026979	4.82415e+08	8.40546e+08
Lamp2	P17047	7	7	5	3001791205	2.87831e+08	5.95649e+07
Gapdh	P16858	45	48	31	2766155487	2382829262	1539546875
Thbs1	P35441	44	46	31	2510242517	2578664412	9.10652e+08
Myh9	Q8VDD5	131	117	81	2476977343	8.39693e+08	1326197242
Myo1f	P70248	20	17	11	2433863771	3.66158e+08	1.24044e+08
Cd63	P41731	7	6	4	2292404496	2.53265e+08	9.40144e+08
Actc1	P68033	6	7	4	2284271537	7.04429e+07	1.10002e+08
Itgb2	P11835	29	28	24	2158014643	3.3265e+08	1552269632
Lgals3bp	Q07797	36	31	24	1841386165	1.84608e+08	1288921016
Lgals3	P16110	21	17	13	1717221907	2.49373e+08	2.84405e+08
Vim	P20152	55	66	38	1660045330	9.4337e+08	8.05553e+08
Fn1	P11276	75	80	95	1640867432	1129882988	12512872969
Itgam	P05555	63	50	43	1580109423	201334985	1082527426
Prdx1	P35700	15	20	11	1575292574	7.33082e+08	1072064025
Mpp1	P70290	13	12	8	1564584239	3.12309e+08	6.01912e+07
Ehd4	Q9EQP2	37	35	25	1495384876	6.44112e+08	4.9432e+08
H3f3c	P02301	6	11	5	1464163728	4.75945e+08	4.76979e+08
A2mp	Q6GQT1	7	7	7	1438345617	2.02361e+08	3.40154e+08
Itih2	Q61703	24	22	22	1363481112	9.04534e+08	8.20134e+08
Tpi1	P17751	14	17	10	1346812170	2.52859e+08	2.78382e+08
Apoa1	Q00623	7	9	5	1292817028	2427005697	5.43358e+08
Ctsd	P18242	13	14	11	1276441416	7.70592e+08	7.45483e+08
Dip2b	Q3UH60	40	31	29	1272552692	9.16562e+07	4.41415e+08
Itih4	A6X935	5	5	5	1201241495	7.91659e+08	7.63293e+07
Capn2	O08529	10	10	9	1134589073	2224259395	1583625394
Anxa4	P97429	27	23	20	1118201734	2.36536e+08	7.63111e+08
Tfrc	Q62351	33	29	25	1104565613	1.45528e+08	5.29492e+08
Lcp1	Q61233	31	29	22	1086985202	4.52422e+08	1567283747
Eno1	P17182	38	40	29	1082066598	5.76426e+08	9.74766e+08
Mvb12b	Q6KAU4	11	8	10	1059844049	7.53401e+07	6.57521e+07
Anxa1	P10107	45	43	33	1052275645	4.05897e+08	1126777972
Elmo1	Q8BPU7	10	9	7	1024824968	2.60342e+07	1.60779e+07
Iqgap1	Q9JKF1	84	83	67	9.01817e+08	8.90802e+08	1824066372
Emilin2	Q8K482	22	23	16	8.90673e+08	2.96063e+08	3.81351e+08
Cct4	P80315	15	15	12	879105653	1.32297e+08	1.45114e+08
Anxa6	P14824	53	52	37	8.64151e+08	3.38237e+08	5.77788e+08
Msn	P26041	47	43	33	8.44466e+08	3.94705e+08	3208792394
Tln1	P26039	84	84	71	834799254	667407982	1826533762
Tuba4a	P68368	5	5	5	8.03964e+08	9.32372e+08	1.60122e+08
Lamp1	P11438	8	8	8	7.89009e+08	253618892	5.52126e+08
Cct6a	P80317	12	12	7	777366983	2.21664e+08	2.15074e+07
Arpc2	Q9CVB6	11	9	7	7.30616e+08	1.22342e+08	2.41723e+08
Igsf8	Q8R366	22	15	13	713282433	6.50279e+07	2.58522e+08
Anxa2	P07356	34	30	23	7.01062e+08	1.49936e+08	8.10286e+08
Ptgfrn	Q9WV91	26	20	16	6.88492e+08	3.53873e+08	1896864487
Atp6v1b2	P62814	19	18	16	6.8334e+08	4.82863e+08	3.81614e+08
Itga2b	Q9QUM0	29	20	17	672876895	1.81017e+08	3.48831e+08
Krt5	Q922U2	16	18	12	6.55401e+08	3.52826e+08	3.74078e+08
Cd9	P40240	5	5	2	6.46958e+08	1.68065e+07	149008363
Ldha	P06151	23	19	15	6.4047e+08	1.33805e+08	3.56849e+08
Anxa11	P97384	25	21	17	6.36531e+08	7.16118e+07	2.50122e+08
Slc4a1	P04919	22	19	12	6.33152e+08	1.07989e+08	3.37109e+07
Atp6v1a	P50516	46	36	27	6.27311e+08	4.90321e+08	3.65716e+08
C3	P01027	18	20	14	6.23083e+08	1204706995	5.66103e+08
Anxa7	Q07076	17	16	11	6.07818e+08	6.33638e+07	4.03174e+08
Tsg101	Q61187	21	20	18	6.04343e+08	4.11633e+08	4.29537e+08
Itgb1	P09055	15	13	13	5.91698e+08	1.22087e+08	7.25294e+08
Arrdc1	Q99KN1	12	11	11	5.86505e+08	3.74129e+07	5.26357e+08
Itgb3	O54890	22	18	13	5.80418e+08	6.49449e+08	8.81042e+08
Rpl26	P61255	3	2	3	5.76518e+08	6.46328e+07	2.53414e+07
Fermt3	Q8K1B8	29	20	19	569935393	2.00458e+08	8.25232e+08
Akr1a1	Q9JII6	16	15	13	5.62249e+08	2.48938e+08	2.70216e+08
Tkt	P40142	34	38	19	5.59797e+08	5.09709e+08	1.78967e+08
Gpnmb	Q99P91	17	13	7	5.57075e+08	4.63473e+08	3.23912e+08
Eef2	P58252	32	32	22	5.56179e+08	3.25133e+08	3.54717e+08
Krt76	Q3UV17	3	3	1	5.52857e+08	4.8278e+08	1058537133
Capg	P24452	21	23	17	5.50182e+08	4.39697e+08	3.15427e+08
Vcl	Q64727	49	49	47	5.18275e+08	6.47202e+08	3778837929
Tf	Q921I1	3	3	3	5.12245e+08	7.45101e+07	1.85645e+08
Hnrnpm	Q9D0E1	39	38	31	5.0826e+08	3.27799e+08	1.25083e+08
Psap	Q61207	16	17	9	4.92208e+08	1055625276	2.97069e+08
Stat1	P42225	24	22	17	4.89491e+08	3.72153e+08	1.86805e+08
Tgfbi	P82198	23	24	12	4.8655e+08	7.7168e+08	2.06886e+08
F2	P19221	6	7	5	4.69911e+08	1.02254e+08	9.72164e+07
Postn	Q62009	16	21	14	4.61696e+08	408723438	1.45212e+08
Kng1	O08677	2	2	2	4.55799e+08	7.89994e+08	4.30665e+07
Pfn1	P62962	14	11	10	4.54663e+08	1.25883e+07	2.80706e+08
Ywhah	P68510	11	9	9	4.54024e+08	1.2018e+08	1.03354e+08
Itgav	P43406	33	27	20	4.48792e+08	4.29812e+07	3.21982e+08
Lmna	P48678	24	25	16	4.47445e+08	462215263	2.09925e+08
Rab7a	P51150	13	13	11	4.43583e+08	1.08304e+08	4.42371e+08
Ddx5	Q61656	16	15	10	4.35791e+08	1.33915e+08	1.5461e+07
Psma1	Q9R1P4	8	8	5	4.28122e+08	1171877542	1.55423e+08
Galnt1	O08912	6	6	5	4.27606e+08	3.16512e+07	8.18663e+06
Wdr1	O88342	26	24	18	4.19886e+08	269013522	279347321
Snx5	Q9D8U8	8	9	4	4.18672e+08	6.06262e+07	6.34268e+07
Cfl1	P18760	12	13	11	4.18515e+08	1.0967e+08	6.60441e+08
Rps9	Q6ZWN5	11	10	6	4.16736e+08	8.56036e+07	2.91236e+08
Coro1a	O89053	10	9	7	415531685	2.59023e+08	9.93085e+07
Clta	O08585	11	11	7	4.125e+08	6.09301e+07	1.12421e+08
Ftl1	P29391	15	9	9	4.12295e+08	2.46064e+07	4.62174e+07
Mdh1	P14152	7	6	5	4.11797e+08	5.30414e+08	3.28976e+08
Uap1l1	Q3TW96	15	15	11	4.06846e+08	3.10497e+08	6.68702e+08
Slc3a2	P10852	22	15	12	4.00063e+08	1.18412e+08	5.56632e+08
Man2a1	P27046	29	25	21	3.98393e+08	8.01952e+07	1.47769e+08
Npm1	Q61937	6	6	6	395246832	4.49665e+07	1.16926e+08
F5	O88783	12	12	9	3.90468e+08	1.4749e+08	1.46429e+08
Hsp90ab1	P11499	23	19	14	3.89335e+08	1705486177	3.25034e+08
Eif4a1	P60843	18	14	12	3.8847e+08	4.76741e+07	1.07536e+08
Col1a1	P11087	41	39	61	3.86182e+08	4.67169e+08	7985048022
Fam129b	Q8R1F1	26	23	17	3.83564e+08	1.26334e+08	1.61946e+08
C1qtnf3	Q9ES30	10	10	7	3.82856e+08	1.56409e+08	1.43815e+07
Dync1h1	Q9JHU4	16	11	12	3.80303e+08	4.42496e+08	6.48033e+07
Idh1	O88844	21	18	17	3.79623e+08	7.82992e+07	9.74335e+07
Tagln2	Q9WVA4	19	17	11	3.79599e+08	138025145	5.9602e+07
Cyfip2	Q5SQX6	2	2	2	3.74114e+08	1.15667e+07	6.26119e+06
Mvp	Q9EQK5	19	18	17	3.6988e+08	3.13128e+08	222375249
Atp1a1	Q8VDN2	19	17	17	3.69426e+08	1.08982e+08	382387551
Tubb5	P99024	9	11	10	3.68451e+08	1.52563e+08	2.32332e+08
C1qc	Q02105	9	10	7	3.68158e+08	3.75658e+08	7.85956e+08
Ywhaz	P63101	16	18	14	3.64496e+08	2.23927e+08	1249728939
Cap1	P40124	18	27	19	3.63971e+08	2.86298e+08	1120820790
Anxa5	P48036	14	17	11	3.63923e+08	1.33167e+08	9.04267e+08
Cndp2	Q9D1A2	21	21	13	3.62557e+08	1234228291	1.86525e+08
Fth1	P09528	13	11	6	3.60061e+08	1.11187e+07	1.66474e+08
Adam10	O35598	15	11	6	3.53331e+08	3.51816e+07	1.61455e+08
Serpinc1	P32261	7	6	4	3.49865e+08	1.10191e+08	1.20309e+07
Ptpn6	P29351	29	28	14	3.46441e+08	3.44849e+08	8.37454e+08
Vps36	Q91XD6	6	5	4	3.41893e+08	8.37791e+07	1.11232e+08
Chmp4b	Q9D8B3	17	17	10	3.41727e+08	8.66863e+07	1.69404e+08
Col1a2	Q01149	40	37	48	3.40775e+08	2.53253e+08	3448237519
Rpl5	P47962	11	10	5	335616083	1.42436e+08	1.31201e+08
Jup	Q02257	13	12	11	3.23478e+08	120065698	1.40564e+08
Pdia3	P27773	21	25	12	320894258	1.63285e+08	1.06977e+08
Cd180	Q62192	18	16	15	3.20383e+08	8.18233e+07	9.24229e+07
Myo1g	Q5SUA5	32	27	19	3.17547e+08	9.96521e+07	1.50582e+08
Cat	P24270	17	15	8	3.17031e+08	1.94673e+08	4.79594e+07
Aldh16a1	Q571I9	12	9	9	3.15994e+08	2.42893e+08	5.53721e+08
Tpp2	Q64514	30	20	21	315741112	1.28986e+08	3.30178e+08
Stom	P54116	15	17	15	3.13475e+08	182597471	9.89029e+08
Msr1	P30204	12	7	9	306817222	1.3664e+07	1.77606e+08
Grb2	Q60631	9	5	5	3.01984e+08	1.76349e+08	5.64829e+08
Pgk1	P09411	19	20	13	2.97096e+08	1.45476e+08	1.57301e+08
Cd82	P40237	7	6	3	2.94668e+08	3.28053e+08	1.0915e+07
Vat1	Q62465	17	15	14	2.92991e+08	1.74684e+08	6.02544e+08
Gnai2	P08752	15	17	12	2.89985e+08	1.35702e+08	3.90291e+08
Chil3	O35744	14	12	10	2.88105e+08	4.07552e+07	7.25218e+07
Cand1	Q6ZQ38	7	4	4	2.88074e+08	6.41473e+06	3.41764e+07
Mpeg1	A1L314	16	12	11	2.8595e+08	2.21059e+07	1.22259e+08
H2-D1	P01899	16	14	7	2.81918e+08	1.69787e+08	5.69022e+07
Myl6	Q60605	12	7	6	2.77978e+08	2.38551e+07	1.04969e+08
Ran	P62827	11	11	8	2.74808e+08	1.77824e+08	1.99592e+08
Itga4	Q00651	15	14	12	2.73127e+08	2.5233e+07	1.86393e+08
Blvrb	Q923D2	12	9	6	2.68116e+08	9.19578e+07	5.14918e+07
Rab10	P61027	7	7	6	2.6564e+08	2.89896e+07	1.41005e+08
Pgd	Q9DCD0	18	17	12	2.64707e+08	6.81008e+07	2.78884e+08
Srsf7	Q8BL97	3	3	2	2.62788e+08	1.44497e+08	2.41025e+07
Ehd1	Q9WVK4	25	24	13	2.61417e+08	1.06993e+08	268019644
Fabp5	Q05816	10	8	6	2.58376e+08	3.38262e+07	1.51658e+08
Nucb1	Q02819	17	16	7	2.58061e+08	9.03311e+07	3.64809e+07
Rtn4	Q99P72	12	11	4	2.48957e+08	1.25658e+08	1.60332e+08
Myo1c	Q9WTI7	29	27	22	2.47187e+08	1.02378e+08	1757864352
Nsf	P46460	15	16	13	2.43998e+08	189282685	1.13608e+08
Prep	Q9QUR6	6	5	3	2.39534e+08	2.21714e+08	117474895
Sacs	Q9JLC8	2	1	1	2.392e+08	5.3647e+07	623510
Cs	Q9CZU6	5	4	3	2.37344e+08	1.56743e+08	5.42729e+08
Lilrb3	P97484	11	10	8	2.33851e+08	2.08687e+07	3.05111e+08
Psmd2	Q8VDM4	29	23	16	229478594	8.64374e+07	1.07901e+08
Ilk	O55222	18	16	13	2.28828e+08	6.14756e+07	1.83481e+08
Gnb2l1	P68040	12	9	6	2.28612e+08	2.85819e+07	1.23687e+08
Ap3b1	Q9Z1T1	24	19	16	2.28318e+08	2.15442e+08	1.18238e+08
Plec	Q9QXS1	6	8	5	2.26562e+08	8.07491e+07	1.37729e+08
Myo1e	E9Q634	20	21	14	2.26108e+08	124220062	1.20384e+08
Calm1	P62204	11	4	10	2.25847e+08	1.13635e+07	1.34415e+08
Eprs	Q8CGC7	12	13	8	2.23662e+08	6.1976e+07	1.73832e+08
Uba1	Q02053	24	20	15	2.20965e+08	7.72698e+07	5.2257e+07
Sub1	P11031	4	3	3	2.2035e+08	177316801	6.30093e+08
Rab1A	P62821	12	14	12	220026262	9.05554e+07	3.87541e+08
Vwa5a	Q99KC8	15	14	11	2.18607e+08	1.21337e+08	1.3748e+08
Hgs	Q99LI8	3	3	2	2.1535e+08	9.53012e+07	1.73616e+08
Tspan14	Q8QZY6	10	9	5	2.13311e+08	1.64773e+07	2.02235e+07
M6pr	P24668	7	7	4	2.13258e+08	4.45431e+07	5.18392e+07
Esyt1	Q3U7R1	25	26	12	2.13196e+08	1.04626e+08	1.54145e+07
Cd84	Q18PI6	12	9	6	211988991	1.02918e+08	1.1566e+08
Rab8a	P55258	5	5	4	2.11284e+08	1.87321e+07	5.25689e+07
Itgb5	O70309	18	12	10	2.10701e+08	9.36636e+06	5.06457e+08
Rpl14	Q9CR57	6	6	4	209097926	9.43279e+07	7.11719e+07
Vps37b	Q8R0J7	14	12	11	2.08803e+08	2.16215e+07	1.84156e+08
Cd68	P31996	2	2	2	2.08253e+08	9.20196e+07	1.26573e+08
Psmd7	P26516	10	6	5	207423516	100543942	6.5324e+08
Actr3	Q99JY9	8	8	5	2.07398e+08	4.06623e+08	1.10873e+08
Rab11b	P46638	10	11	8	206712868	8.24313e+07	3.62983e+08
Hsp90aa1	P07901	17	14	11	2.06655e+08	1.30721e+08	137018907
Rab14	Q91V41	15	13	13	2.06392e+08	182776182	6.34955e+08
Rab27b	Q99P58	2	2	2	2.06276e+08	2.88636e+06	4.62425e+07
Rap1b	Q99JI6	4	3	5	205309865	1.33322e+07	2.38816e+08
Samhd1	Q60710	18	18	11	2.05211e+08	1.4143e+08	361672916
Rps4x	P62702	15	15	12	2.04896e+08	9.0427e+07	1435467246
S100a9	P31725	11	8	7	2.03717e+08	3.66841e+07	155809907
Cct5	P80316	13	12	6	2.03705e+08	8.20372e+07	2.95014e+07
Pla2g7	Q60963	21	20	11	2.03188e+08	2.01452e+08	3.77903e+07
Itgax	Q9QXH4	20	14	11	2.01247e+08	2.63659e+08	372222283
Actr2	P61161	14	12	7	2.00883e+08	3.98672e+07	1.04205e+08
Ahcy	P50247	12	12	7	2.00455e+08	5.42316e+07	5.85277e+07
Daglb	Q91WC9	11	7	6	2.00012e+08	5.20411e+07	3.65238e+07
Rab15	Q8K386	2	1	1	1.9998e+08	4.33941e+07	1.31414e+08
Apoh	Q01339	2	2	2	1.98852e+08	1.64347e+08	1.54552e+07
Cct8	P42932	26	24	19	197281876	145909702	7.74958e+07
Cct3	P80318	19	18	12	1.97019e+08	1.88237e+08	2.08399e+08
Rps3	P62908	14	15	10	1.95357e+08	6.33644e+07	1.44821e+08
Rpl3	P27659	16	14	9	1.95319e+08	7.07584e+07	9.18363e+07
Clic1	Q9Z1Q5	8	8	9	1.95189e+08	5.66734e+07	2.28049e+08
Hk3	Q3TRM8	20	18	15	1.92141e+08	6.50248e+07	1.70128e+08
Fcgr1	P26151	8	7	7	1.90309e+08	5.06644e+07	6.67213e+07
Vps4b	P46467	11	11	8	189743468	2.15949e+08	7.726e+07
Ap2m1	P84091	16	13	10	1.89259e+08	5.79648e+07	2.07807e+08
Lum	P51885	3	3	4	1.83466e+08	8.84327e+07	4.36865e+07
Ifitm3	Q9CQW9	9	7	4	1.82817e+08	2.19784e+07	94706229
Ca2	P00920	13	9	5	1.82238e+08	7.59487e+06	3.74127e+07
Lgals1	P16045	8	4	5	1.80741e+08	9.24786e+06	1.31069e+08
Saa3	P04918	6	6	5	1.78824e+08	4.46766e+07	1.01171e+08
Ctsb	P10605	12	10	5	1.77853e+08	3.69099e+07	5.28273e+07
Rab1b	Q9D1G1	9	11	7	1.7662e+08	4.00441e+07	1.46211e+08
Tubb1	A2AQ07	8	6	6	1.76242e+08	9.82801e+07	2.36409e+08
Mvb12a	Q78HU3	8	6	8	1.75351e+08	8.57782e+06	1.05759e+08
Itih3	Q61704	11	10	5	1.75119e+08	1.20955e+08	3.04576e+07
Syk	P48025	30	28	15	1.75006e+08	1.82095e+08	4.90745e+07
Flot1	O08917	17	16	14	1.74775e+08	1.51344e+07	6.9006e+07
Glg1	Q61543	11	9	11	1.73359e+08	4.96267e+07	223631920
Capzb	P47757	9	10	8	1.71808e+08	7.48527e+07	4.41263e+08
C1qb	P14106	6	5	3	1.68766e+08	5.81231e+07	1.31895e+08
Ctsz	Q9WUU7	2	2	2	1.67393e+08	1.64382e+07	2.12877e+07
Arpc4	P59999	8	8	8	1.66872e+08	2.45417e+07	9.16484e+07
Dpysl2	O08553	16	18	11	1.63303e+08	313769003	4.80527e+07
Ralb	Q9JIW9	1	2	2	1.62061e+08	1.83711e+07	3.00457e+07
Arf1	NA	7	3	5	1.59895e+08	2.30658e+06	64024680
Rab35	Q6PHN9	4	4	3	1.59489e+08	1.1339e+07	1.78477e+07
Atp6v1e1	P50518	12	14	10	1.59131e+08	7.95996e+07	1.6097e+08
Apaf1	O88879	4	4	2	1.59061e+08	3122428297	6.85348e+06
Gpi	P06745	16	14	9	1.58362e+08	3.51168e+07	3.83981e+07
Prdx2	Q61171	10	10	8	1.55981e+08	6.05459e+07	106063052
Rpl7	P14148	12	12	9	1.55793e+08	9.37575e+07	1.26476e+08
Rpsa	P14206	9	8	7	1.5538e+08	1.34727e+08	9.87095e+07
Itga6	Q61739	20	15	15	1.53558e+08	4.94927e+07	1.70148e+08
Fgg	Q8VCM7	7	6	2	1.53449e+08	3.98096e+07	3.1869e+06
Cd44	P15379	7	7	6	1.52404e+08	3.58598e+07	1.24045e+08
Calr	P14211	10	9	9	1.52116e+08	1.82135e+08	221513113
Cct2	P80314	24	21	13	1.5108e+08	2.35867e+08	27217612700
Rgn	Q64374	4	4	3	1.50738e+08	7.24251e+06	4.52527e+06
Ap2b1	Q9DBG3	19	13	13	1.50642e+08	4.18587e+08	3.3662e+08
Cotl1	Q9CQI6	8	7	7	1.50549e+08	1.55054e+07	2.01322e+08
Ldhb	P16125	9	6	6	1.4961e+08	3.40857e+07	2.48159e+08
Tcp1	P11983	19	20	9	149496820	1.82874e+08	3.7729e+07
Pgam1	Q9DBJ1	14	15	10	1.47041e+08	8.05967e+07	8.98407e+07
Psmb6	Q60692	3	3	2	1.46969e+08	4.75688e+07	2.12599e+07
Mfsd1	Q9DC37	2	2	2	146696648	1.51533e+08	7.89348e+06
Atp5a1	Q03265	13	12	6	1.46152e+08	1.5538e+08	5.38594e+08
Sri	Q6P069	6	5	4	1.44888e+08	2.51817e+07	7.64716e+07
Hspa5	P20029	18	21	16	1.44798e+08	1.44361e+08	3.86456e+08
Snx3	O70492	7	5	4	1.43559e+08	1.199e+07	6.93878e+07
Pygl	Q9ET01	9	6	4	1.42303e+08	3.0684e+07	1.67318e+07
Fbln1	Q08879	7	7	5	1.41129e+08	8.88986e+07	4.79107e+06
Ttyh2	Q3TH73	8	6	6	1.39884e+08	1.9738e+07	4.79759e+07
Hnrnpc	Q9Z204	9	10	5	1.3909e+08	2.45343e+08	2040318470
Myof	Q69ZN7	22	22	21	1.38441e+08	1.08176e+08	4.77821e+08
Hnrnpa3	Q8BG05	15	16	6	1.37897e+08	6.88479e+07	5.80492e+07
Ptprc	P06800	15	15	10	1.37095e+08	3.80411e+07	2.42627e+08
Rps3a	P97351	13	13	8	1.37064e+08	4.32216e+07	1.48308e+08
Capn1	O35350	16	16	11	1.35704e+08	2.40391e+08	2.19778e+07
Anxa3	O35639	11	12	11	1.34712e+08	3.33851e+07	8.05894e+07
Gdi2	Q61598	10	6	8	1.33504e+08	8.94597e+06	2.21116e+08
Flot2	Q60634	17	13	11	1.32884e+08	3.12586e+07	2.28285e+08
Gna13	P27601	8	6	6	1.32232e+08	115262931	1.34324e+08
Arhgdia	Q99PT1	5	6	3	1.31845e+08	2.46994e+07	9.32286e+07
Dars	Q922B2	16	14	11	1.31591e+08	3.43069e+07	5.77736e+07
Gnaq	P21279	6	5	6	1.31015e+08	2.34681e+07	2.52074e+08
Galnt2	Q6PB93	14	14	9	1.30377e+08	9.26222e+07	3.63011e+07
Psmd1	Q3TXS7	13	12	7	1.29468e+08	4.39235e+07	1.85386e+08
Psmd3	P14685	22	20	15	1.29176e+08	9.44345e+07	6.84107e+07
Cd47	Q61735	7	6	7	1.29065e+08	4.11687e+07	7.24791e+07
Rps2	P25444	9	9	6	1.28867e+08	1.24309e+08	8.79813e+07
Psmd11	Q8BG32	12	11	7	1.26184e+08	7.44014e+07	8.06133e+06
Hnrnpk	P61979	12	13	5	1.25234e+08	3.86979e+07	1.01274e+08
Arpc1b	Q9WV32	9	11	9	1.24768e+08	4.77382e+07	1.22139e+08
Rab8b	P61028	10	9	4	1.24423e+08	2.97647e+07	1.24049e+08
Cyfip1	Q7TMB8	17	14	13	1.24001e+08	5.30008e+07	2.36542e+08
Rpl4	Q9D8E6	13	12	8	1.2387e+08	6.01211e+07	5.50572e+07
Atp6ap2	Q9CYN9	13	11	12	1.23587e+08	5.61901e+07	1.42493e+08
Rpl18	P35980	8	7	5	1.22222e+08	4.74095e+07	1.85758e+08
Rab5c	P35278	10	9	8	1.21712e+08	1.9256e+07	8.99306e+07
Hspa1b	P17879	8	8	7	121530822	89603985	5.27756e+07
Sfpq	Q8VIJ6	11	14	10	1.21217e+08	1.247e+08	5.82385e+08
Col6a1	Q04857	11	9	8	1.20704e+08	3.55052e+08	1.13768e+08
Cpb2	Q9JHH6	4	3	3	1.2062e+08	7.24676e+06	6.4286e+06
Galnt7	Q80VA0	12	10	6	1.20347e+08	5.64861e+07	2.30534e+07
Gnas	Q6R0H7	7	8	6	1.18816e+08	1.25643e+07	1.80782e+08
Ewsr1	Q61545	3	3	3	1.18567e+08	2.05754e+07	2.13299e+06
Arl8b	Q9CQW2	9	7	7	1.18512e+08	1.08826e+07	2.15466e+07
Hspd1	P63038	9	7	8	1.1754e+08	1.34824e+08	8.75521e+07
C1qa	P98086	8	8	5	1.17499e+08	7.68975e+07	2.53387e+07
Rps18	P62270	12	11	8	116956053	6.82757e+07	3.40661e+08
Lmnb1	P14733	11	10	9	1.16884e+08	2.87937e+07	3.59784e+07
Ywhae	P62259	10	10	8	1.16028e+08	3.80243e+07	2.63932e+08
Plscr3	Q9JIZ9	7	8	4	1.15617e+08	2.71623e+07	2.83706e+07
Ctss	O70370	7	4	3	1.15541e+08	2.78179e+07	1.45713e+07
Pabpc1	P29341	15	14	11	1.14113e+08	9.58699e+07	2.69946e+07
Pltp	P55065	14	16	9	1.13834e+08	1.15457e+08	3.24186e+08
Cybb	Q61093	11	11	9	1.13255e+08	4.08819e+07	2.10214e+07
Lrrc25	Q8K1T1	8	7	4	1.12851e+08	2.28423e+07	3.13526e+06
Gstm1	P10649	7	5	5	1.12822e+08	2.27627e+07	2.12538e+07
Rps8	P62242	6	6	5	1.12617e+08	5.17152e+07	9.75327e+07
Dnm2	P39054	12	12	7	1.12355e+08	2.77198e+07	6.95533e+07
Hist1h1b	P43276	5	3	5	1.11836e+08	1.68915e+07	8.5937e+07
Hsp90b1	P08113	13	13	13	111753586	7.13525e+07	1.13277e+08
Ap2a2	P17427	18	14	14	1.11406e+08	5.07695e+07	8.69529e+07
Coro1c	Q9WUM4	9	9	6	1.09403e+08	9.5307e+07	2.78676e+07
B2m	P01887	3	2	2	1.09351e+08	1.25915e+07	3.2998e+07
Aldh3b1	Q80VQ0	12	9	6	1.0881e+08	2.26484e+07	3.25437e+07
Prdx5	P99029	7	5	4	1.08058e+08	1.33722e+07	8.4717e+07
Tubb6	Q922F4	3	2	3	1.07476e+08	7.26176e+07	5.73066e+06
Rhog	P84096	10	7	7	1.07356e+08	1.7334e+07	3.90872e+07
Stxbp2	Q64324	14	12	3	1.06919e+08	3.58786e+07	2.45516e+07
Ncf2	O70145	14	13	7	1.06837e+08	7.26777e+07	2.48492e+07
Fgb	Q8K0E8	2	2	1	1.0669e+08	1.99448e+07	1.72637e+06
Eif3a	P23116	22	18	11	106233977	1.39599e+08	1.26241e+08
Vps37c	Q8R105	9	8	6	106134878	1.09804e+07	8.01069e+07
Pgm1	Q9D0F9	10	10	7	1.05336e+08	8.60478e+07	1.48571e+08
Psmc2	P46471	17	16	14	1.05166e+08	4.21687e+07	249304463
Coro1b	Q9WUM3	9	9	6	1.04197e+08	1.08292e+08	2.98408e+07
Esd	Q9R0P3	9	6	4	1.03872e+08	1.64611e+07	3.41897e+07
Ppp2r1a	Q76MZ3	17	16	11	1.03739e+08	8.28213e+07	2.99427e+07
Rpl7a	P12970	8	8	7	1.03243e+08	4.16599e+07	4.80063e+07
Cd14	P10810	10	10	5	1.01747e+08	2.18658e+07	239311152
Sirpa	P97797	10	9	7	1.00648e+08	1.70701e+07	3.27307e+08
Prdx6	O08709	11	11	6	1.00604e+08	4.40878e+07	8.41398e+07
Cmpk1	Q9DBP5	7	6	4	99186080	1.42179e+07	7.39477e+06
Mettl7b	Q9DD20	2	2	2	9.89586e+07	6.43298e+06	7.81934e+07
Akr1b1	P45376	9	7	6	9.87102e+07	4.34564e+07	5.10451e+07
Atic	Q9CWJ9	15	14	8	9.84905e+07	6.86995e+07	8.91462e+06
Cdc42	P60766	7	4	5	9.82425e+07	1.74905e+07	4.21444e+07
Hexa	P29416	12	12	5	9.79754e+07	1.02789e+08	7.35337e+08
Cstb	Q62426	6	4	2	9.78444e+07	1.86067e+06	4.8546e+07
Psmc1	P62192	7	7	5	9.68215e+07	5.00565e+07	9.01014e+06
Pld3	O35405	7	6	5	9.6735e+07	1.41355e+07	5.42637e+07
Hnrnpl	Q8R081	17	17	7	9.59429e+07	8.44121e+07	1.40641e+07
Atp5b	P56480	9	9	7	9.52751e+07	1.43755e+07	3.0003e+08
Copa	Q8CIE6	16	15	10	9.48511e+07	1.69282e+08	4.39405e+07
Atp6v1c1	Q9Z1G3	14	13	14	9.47489e+07	3.76254e+07	6.23982e+07
Brox	Q8K2Q7	6	5	5	9.46606e+07	9.932e+06	8.47447e+07
Vps35	Q9EQH3	16	13	10	9.37122e+07	3.79453e+07	8.67799e+07
Xylt2	Q9EPL0	7	7	6	9.36663e+07	8.21106e+07	8.61813e+07
Fen1	P39749	3	2	2	9.35968e+07	1.01148e+08	5.79993e+07
Capza2	P47754	7	5	5	9.35184e+07	2.44194e+07	3.73394e+07
Ywhag	P61982	8	7	5	9.35069e+07	5.29835e+07	1.55452e+08
P2rx4	Q9JJX6	6	6	4	9.3504e+07	5.5221e+07	1.09414e+07
Pkm	P52480	6	5	2	9.34982e+07	1.25315e+07	1.30589e+07
Map1s	Q8C052	5	5	3	9.28956e+07	1.54022e+07	7.41997e+06
Comp	Q9R0G6	8	7	5	9.28714e+07	5.68814e+07	7.52991e+07
Slc2a1	P17809	8	9	6	9.27447e+07	3.96299e+07	2.18506e+08
Rsu1	Q01730	5	4	5	9.23037e+07	8.21021e+06	4.91261e+07
Aldoa	P05064	8	7	6	92099370	2.72761e+07	7.17122e+07
Cct7	P80313	14	13	7	9.18531e+07	5.69574e+07	2.50933e+07
P4hb	P09103	16	13	8	9.08362e+07	4.39999e+07	8.29441e+08
Arf6	P62331	6	4	5	90607889	940075	2.91132e+08
Pdcd6	P12815	8	5	3	9.02175e+07	6.26051e+06	4.5488e+06
Eif3d	O70194	7	8	2	8.89481e+07	3.25793e+07	414434
Atp6v0d1	P51863	8	9	7	8.8389e+07	3.1903e+07	5.01357e+07
Por	P37040	16	18	11	8.83263e+07	9.75719e+07	1.59778e+08
Edil3	O35474	5	5	6	8.82829e+07	1.26173e+08	3.14429e+08
Ckb	Q04447	11	8	8	8.78492e+07	4.20261e+07	8.86912e+07
Lyn	P25911	13	11	7	8.72e+07	4.7547e+07	2.69073e+07
Actbl2	Q8BFZ3	5	6	3	8.52776e+07	1.57558e+08	2.78301e+08
Krt6a	P50446	8	8	7	8.50025e+07	8.41591e+07	4.53705e+07
Snrnp70	Q62376	7	6	6	8.4552e+07	5.28895e+07	6.05285e+07
Mrc1	Q61830	19	19	13	8.43505e+07	1.13411e+08	9.17683e+07
Itga5	P11688	8	5	5	8.37849e+07	4.4221e+07	3.89735e+07
Ptbp1	P17225	4	4	4	8.3379e+07	9.30329e+06	3.62991e+07
Tpm4	Q6IRU2	5	4	4	8.33122e+07	4.67878e+07	1.1762e+08
Ncf4	P97369	7	7	5	8.32133e+07	1.60073e+08	8.64406e+07
Stxbp3	Q60770	10	6	5	8.321e+07	2.34992e+07	3.4975e+07
Hspa4	Q61316	8	8	7	8.28915e+07	1.21367e+07	3.8129e+07
Chmp1b1	Q99LU0	6	6	4	8.25396e+07	1.98618e+07	115207511
Psmd6	Q99JI4	10	9	7	8.2046e+07	7.84089e+07	4.98555e+07
Rpl11	Q9CXW4	4	3	1	8.20305e+07	13595745	1.53501e+07
Krt42	Q6IFX2	5	6	4	8.17804e+07	3.40507e+08	8.32487e+07
Taldo1	Q93092	9	9	7	8.17047e+07	2.85799e+07	2.4648e+07
Tm9sf3	Q9ET30	5	4	4	8.13436e+07	3.31535e+07	1.54151e+07
Arhgdib	Q61599	8	6	5	8.08692e+07	9.31088e+06	6.6621e+07
Eef1g	Q9D8N0	13	13	8	8.05221e+07	2.65298e+07	5.45342e+07
Gusb	P12265	12	11	8	8.03536e+07	2.11203e+08	3.65179e+07
Prpf19	Q99KP6	5	5	3	8.03447e+07	1.04598e+07	133520249
Lyz2	P08905	2	0	1	7.96898e+07	0	4.21498e+07
C4b	P01029	7	6	4	7.96038e+07	9.80185e+07	3.4107e+06
Lasp1	Q61792	11	12	8	7.91426e+07	8.49502e+07	7.86493e+08
Hnrnpd	Q60668	7	6	6	7.83357e+07	1.69274e+08	304409025
Serpind1	P49182	3	4	1	7.72662e+07	9.85986e+07	32253.2
Psmd13	Q9WVJ2	10	9	7	7.71481e+07	4.19403e+07	1385138745
Parvb	Q9ES46	7	6	7	7.68354e+07	1.30153e+07	1.21971e+08
Igfbp2	P47877	10	13	5	7.67757e+07	2.31129e+08	1.28173e+08
Myl12b	Q3THE2	5	4	4	7.607e+07	6.73363e+06	6.92085e+06
Akr1e2	Q9DCT1	2	1	2	7.54271e+07	1.41196e+07	2.74488e+07
Itm2b	O89051	6	6	4	7.42605e+07	5.53957e+07	6.50669e+07
Rps6	P62754	7	5	5	7.41545e+07	1.9729e+07	6.40702e+07
Pol	P10404	7	4	5	7.35849e+07	3.94478e+06	2.21329e+08
F10	O88947	3	3	3	7.31151e+07	9.06654e+07	2.27314e+08
Ist1	Q9CX00	7	7	6	7.26243e+07	1.58292e+07	1.097e+08
Ank1	Q02357	5	6	6	7.21901e+07	2.21454e+07	171646725
Arpc3	Q9JM76	8	7	2	7.19678e+07	5.1112e+07	227043
Rnh1	Q91VI7	4	3	3	7.16257e+07	2.18006e+07	2.89886e+07
Eif3e	P60229	10	7	8	7.13732e+07	2.90127e+07	1.74721e+07
Rps11	P62281	9	10	2	7.13321e+07	2.93358e+07	1.04321e+07
Nars	Q8BP47	8	9	4	7.12783e+07	3.72255e+07	3.14919e+06
Ehd3	Q9QXY6	4	4	2	7.09232e+07	4.17282e+07	1.29635e+07
Stip1	Q60864	16	15	8	7.09009e+07	4.46554e+07	9.02316e+06
Camk2d	Q6PHZ2	10	12	4	7.05702e+07	9.63909e+07	5.10547e+07
Dstn	Q9R0P5	2	2	2	7.02503e+07	1.77207e+06	1.53056e+06
Inpp5d	Q9ES52	8	8	5	6.994e+07	2.40377e+07	6.24373e+07
Psmd12	Q9D8W5	11	7	6	6.9516e+07	1.26345e+07	1.95184e+07
Hnrnpab	Q99020	9	9	5	6.91171e+07	1.92438e+07	2.22747e+08
Cyba	Q61462	4	4	3	6.87329e+07	8.78786e+06	4.39196e+07
Ap2a1	P17426	10	8	6	6.84775e+07	4.32653e+07	6.3593e+07
Vav1	P27870	15	12	8	6.81362e+07	2.90003e+07	7.5868e+07
Psmc3	O88685	14	14	10	6.76132e+07	8.46924e+07	5.01732e+07
Man2b1	O09159	8	8	6	6.7607e+07	1.42869e+07	9.49915e+06
Pcbp1	P60335	3	3	4	6.74684e+07	2.64586e+07	1.61006e+07
Dek	Q7TNV0	6	6	3	6.74359e+07	7.2059e+07	4.68987e+07
Psmc4	P54775	11	10	5	6.70138e+07	5.715e+07	1.66672e+07
Rpl6	P47911	10	6	9	6.64961e+07	7.16102e+07	1.66691e+08
Evl	P70429	10	10	3	6.57266e+07	3.4847e+07	6.35083e+06
Rac2	Q05144	4	3	0	6.56595e+07	1.01832e+07	0
Steap3	Q8CI59	9	8	5	6.55698e+07	1.77726e+07	2.31315e+07
Hnrnpul1	Q8VDM6	3	3	3	6.50497e+07	1.71211e+07	4.94864e+07
Hist1h1c	P15864	4	5	3	6.49741e+07	22392301111	21260388134
Pnp	P23492	7	6	4	6.46607e+07	7.57697e+06	2.02522e+07
Serpinf1	P97298	2	1	1	6.41315e+07	3.39711e+07	7.13364e+06
Cxcl10	P17515	2	1	2	6.40139e+07	2.09106e+06	4.11315e+07
Dera	Q91YP3	13	7	9	6.39784e+07	3.52967e+06	1.20918e+08
H2afy	Q9QZQ8	6	5	4	6.395e+07	3.39119e+07	1.79981e+07
Hnrnpul2	Q00PI9	11	11	8	6.36505e+07	5.10043e+07	1.79678e+08
Entpd1	P55772	8	5	5	63548740	1.94979e+07	1.77687e+08
Slc25a5	P51881	9	7	7	6.29901e+07	1.53086e+07	4.3693e+08
Txn	P10639	2	2	2	6.29479e+07	8.12379e+06	1.95534e+08
Stat2	Q9WVL2	2	2	1	6.28391e+07	1.70326e+06	5.8734e+06
Tubb2a	Q7TMM9	4	6	3	6.22879e+07	2.87985e+07	2.81133e+07
Rpl21	O09167	4	3	3	6.19599e+07	1.21406e+07	2.63811e+08
Bhmt	O35490	2	2	2	6.19199e+07	2.51013e+06	1.55583e+07
Serpinb6	Q60854	9	7	8	6.18275e+07	2.392e+07	1.22642e+08
Ddx3x	Q62167	11	8	6	6.16878e+07	2.40631e+07	4.80727e+07
Pa2g4	P50580	5	5	2	6.1446e+07	1.24368e+07	1.54501e+07
Srsf2	Q62093	7	7	3	6.13831e+07	1.20055e+07	7.93896e+08
Nono	Q99K48	7	7	7	6.12621e+07	6.68264e+07	1.19838e+07
Rpl23	P62830	4	3	4	6.09697e+07	3.72597e+06	2.1299e+07
Nceh1	Q8BLF1	8	6	5	6.09488e+07	2.15254e+07	2.40215e+07
Stx7	O70439	4	5	4	6.07152e+07	3.87158e+07	4.50834e+08
Plekho2	Q8K124	7	7	4	6.02949e+07	3.08445e+07	3.44929e+07
Rpl13	P47963	6	7	6	6.02764e+07	3.67414e+07	1.8385e+08
Itch	Q8C863	9	6	8	6.01471e+07	2.61648e+06	5.86817e+08
Rps25	P62852	3	3	3	6.00398e+07	1.85439e+07	2.98733e+07
Ap1b1	O35643	4	4	2	6.00187e+07	3.2533e+07	1.17464e+06
Zyx	Q62523	6	7	5	5.99353e+07	1.02248e+08	1.00604e+08
Mapk3	Q63844	9	8	5	5.98008e+07	5.16954e+07	6.56919e+07
Iqgap2	Q3UQ44	10	6	8	5.95745e+07	1.63385e+07	1.03215e+08
Rtn3	Q9ES97	5	5	4	5.95668e+07	2.64804e+07	4.78762e+07
Tubb4b	P68372	3	3	1	5.88923e+07	2.99677e+07	3.71934e+07
Tpm3	P21107	8	7	7	5.80886e+07	4.68476e+07	7.62934e+07
Hist1h1e	P43274	2	2	2	5.76846e+07	1.61293e+07	3.24971e+07
Ctsl	P06797	6	5	4	5.73318e+07	7.88038e+06	6.6835e+06
Syngr1	O55100	4	2	3	5.72507e+07	6.62569e+06	1.73679e+07
Canx	P35564	6	6	4	5.68728e+07	1.27016e+07	1.85255e+07
Hnrnpa2b1	O88569	9	8	3	5.67509e+07	2.96445e+07	1.36638e+07
Rpl27	P61358	5	3	2	5.66531e+07	4.06503e+06	1.35652e+07
Mapk1	P63085	8	7	5	5.62691e+07	2.1791e+07	3.94484e+07
Kpnb1	P70168	10	8	10	5.612e+07	2.4222e+07	7.28177e+07
Emilin1	Q99K41	10	11	7	5.60279e+07	2.74491e+07	8.91475e+07
Cd48	P18181	5	4	1	5.60272e+07	6.05118e+06	401244
Epb41	P48193	10	9	8	5.58098e+07	2.45753e+07	6.72484e+07
Plek	Q9JHK5	7	7	4	5.56789e+07	9.44968e+06	3.17018e+07
Susd3	Q9D176	4	2	3	5.56647e+07	7.12168e+06	2.77618e+08
Muc15	Q8C708	6	4	2	5.54552e+07	5.35289e+06	1.31668e+07
Scamp3	O35609	8	8	3	5.54182e+07	3.97431e+07	2.1554e+06
Eif5a	P63242	4	3	1	5.40189e+07	1.99066e+06	2.62097e+06
Blvra	Q9CY64	8	7	3	5.40127e+07	2.21115e+07	3.44365e+07
B4galt7	NA	2	1	1	5.37164e+07	2.83839e+07	5.91106e+06
Pcyt1a	P49586	4	4	0	5.35682e+07	1.20331e+07	0
Eftud2	O08810	8	6	3	5.34928e+07	3.87759e+07	1.15736e+08
Fcer1g	P20491	4	3	2	5.28246e+07	9.44628e+06	5.65066e+07
Rps6ka3	P18654	12	10	7	5.2794e+07	2.809e+07	1.33591e+07
Atp6v0d2	Q80SY3	8	7	5	5.27682e+07	1.27182e+07	5.82264e+07
Gp1bb	P56400	4	4	3	5.26093e+07	2.79247e+07	9.17164e+06
Slc44a2	Q8BY89	6	6	4	5.25791e+07	1.54981e+07	4.2558e+07
Rps16	P14131	3	4	4	5.2292e+07	1.67193e+06	4.18767e+07
Pf4	Q9Z126	2	1	2	5.22794e+07	1.93848e+06	5.06517e+07
Spp2	Q8K1I3	2	2	1	5.21015e+07	7.49577e+06	1.4622e+06
Rab2a	P53994	6	4	6	5.20476e+07	2.07622e+07	7.29113e+07
Gng2	P63213	3	2	2	5.18934e+07	1.49198e+07	1.56367e+07
Sh3kbp1	Q8R550	7	6	5	5.18639e+07	8.28561e+06	1.9722e+07
Capza1	P47753	5	3	3	5.17741e+07	1.46025e+07	2.56509e+07
Rpl10	Q6ZWV3	5	3	1	5.16364e+07	11057008	2.37805e+07
Psmc5	P62196	11	7	9	5.10842e+07	2.29088e+07	3.25941e+07
Tgm2	P21981	11	11	8	5.10047e+07	5.63286e+07	1.11893e+07
Csnk2b	P67871	3	3	3	5.06478e+07	916479	3.14913e+07
Sod1	P08228	3	1	1	5.05683e+07	1.77293e+06	882067
Rpl15	Q9CZM2	6	5	5	5.04637e+07	2.32445e+07	3.9005e+07
S100a10	P08207	5	3	1	5.043e+07	1.44501e+06	2.72887e+06
Phgdh	Q61753	8	8	5	5.02847e+07	4.78013e+07	4.14886e+07
Pfkl	P12382	13	11	6	5.02732e+07	1.73164e+07	1.46411e+07
Efhd2	Q9D8Y0	11	12	8	5.01061e+07	5.53957e+07	3.86131e+07
Mink1	Q9JM52	9	7	5	5.00347e+07	3.99924e+07	3.30677e+06
Vars	Q9Z1Q9	13	10	5	4.97725e+07	5.61152e+07	6.17879e+07
Clic4	Q9QYB1	2	2	1	4.92753e+07	1.54662e+07	188564
Atp6v0a1	Q9Z1G4	14	15	8	4.91905e+07	4.22697e+07	1.11811e+08
Eif3l	Q8QZY1	14	12	5	4.91758e+07	3.7634e+07	3.14647e+07
Fcgr2	P08101	4	4	2	4.90457e+07	7.67953e+06	4.22461e+06
Lta4h	P24527	15	10	4	4.89358e+07	5.12614e+07	4.33151e+07
Tmed10	Q9D1D4	5	4	5	4.887e+07	7.49327e+06	3.83589e+07
Trim28	Q62318	7	7	6	4.88492e+07	1.69072e+07	1.74557e+07
Scamp2	Q9ERN0	7	6	1	4.84893e+07	4.92329e+07	722352
Cpne3	Q8BT60	6	5	3	4.82812e+07	1.6248e+07	3.30885e+07
Aco1	P28271	9	8	6	4.82193e+07	2.43012e+07	2.06903e+07
Actn1	Q7TPR4	14	9	7	4.79134e+07	1.50437e+07	5.09375e+07
Rpl17	Q9CPR4	5	3	2	4.78847e+07	2.91563e+06	179963
Mocs3	A2BDX3	2	1	2	4.78035e+07	1.40907e+08	1955017982
Plekhb2	Q9QZC7	3	2	3	4.73945e+07	3.18958e+06	3.68747e+08
Slc1a5	P51912	3	3	2	4.7245e+07	5.92531e+06	2.41203e+07
Col18a1	P39061	3	3	3	4.70078e+07	1.46197e+07	2.24499e+07
Man1a1	P45700	11	9	6	4.69566e+07	6.7613e+07	1.58634e+07
Dhx9	O70133	7	7	7	4.68355e+07	2.81168e+07	3.48895e+08
Arhgap25	Q8BYW1	11	10	8	4.67414e+07	4.13041e+07	8.34615e+07
Psmc6	P62334	12	8	3	4.67292e+07	8.05141e+06	3.16467e+06
Pebp1	P70296	2	2	2	4.67269e+07	5.23184e+06	1.43592e+07
Rars	Q9D0I9	14	15	8	4.64958e+07	3.91891e+07	3.18643e+06
Atp1b3	P97370	3	2	3	4.62754e+07	6.43723e+06	4.1249e+06
Ncstn	P57716	7	4	8	4.6203e+07	1.27737e+07	4.39592e+07
Vps25	Q9CQ80	7	5	6	4.60277e+07	2.4859e+06	6.67436e+07
Ttyh3	Q6P5F7	5	5	5	4.5773e+07	2.1748e+07	3.71941e+07
Cpne1	Q8C166	8	9	7	4.56087e+07	4.25838e+07	8.07493e+07
Srp54	P14576	4	4	1	4.52359e+07	4.8124e+07	1.32121e+08
Angptl2	Q9R045	14	13	9	4.5179e+07	4.15468e+07	7.86207e+06
Sh3bgrl3	Q91VW3	3	2	2	4.4736e+07	2.27427e+06	3.13862e+07
Hnrnpf	Q9Z2X1	6	7	6	4.4727e+07	1.59621e+07	4.11167e+07
Snx2	Q9CWK8	11	12	9	4.45326e+07	5.54831e+07	2.01068e+08
Atp6v1h	Q8BVE3	10	9	7	4.45194e+07	1.43565e+07	5.08203e+06
Pyhin1	Q8BV49	3	2	2	4.43758e+07	2.86541e+07	3.13593e+06
Rpl13a	P19253	7	5	5	4.41995e+07	9.42227e+06	1.22514e+08
B4galt1	P15535	4	3	2	4.40025e+07	1.6379e+07	5.83878e+07
Atp1a3	Q6PIC6	3	3	3	4.3974e+07	1.93605e+07	4.20538e+07
Bst2	Q8R2Q8	5	3	2	4.38303e+07	3.38413e+06	2.65288e+07
Rhoa	Q9QUI0	6	7	2	4.36717e+07	8.36291e+06	4.44432e+06
Ruvbl1	P60122	11	9	4	4.33813e+07	9.0957e+06	1.22432e+08
Arpc5	Q9CPW4	4	4	3	4.31147e+07	9.12974e+06	2.05941e+07
Col2a1	P28481	9	6	9	4.30809e+07	7.05498e+06	2.59448e+08
Csnk2a1	Q60737	9	9	7	4.30349e+07	2.14795e+07	3.10621e+07
Rpl28	P41105	5	5	4	4.29428e+07	2.80301e+07	2.58641e+08
Irgm1	Q60766	7	7	3	4.28196e+07	1.55859e+07	4.03469e+06
Plau	P06869	6	6	4	4.27008e+07	9.43549e+06	8.99254e+07
Rpl35	Q6ZWV7	2	2	0	4.26461e+07	2.12258e+06	0
Slc37a2	Q9WU81	5	5	3	4.24826e+07	3.27774e+07	1.22157e+07
Atp2b1	G5E829	13	14	14	4.23287e+07	2.88337e+07	1.53394e+08
Lims1	Q99JW4	2	2	2	4.22197e+07	9.01589e+06	5.91789e+07
Lox	P28301	2	2	2	4.1568e+07	3.62291e+07	8.47657e+07
Plac8	Q9JI48	2	1	1	4.13276e+07	4.84327e+06	8.99218e+07
Rbm25	B2RY56	7	7	4	4.13076e+07	1.31782e+07	7.48213e+06
Psma7	Q9Z2U0	4	4	2	4.12118e+07	2.91159e+07	1.44783e+07
Dock2	Q8C3J5	11	9	7	4.08761e+07	1.17584e+07	1.84386e+07
Pfkp	Q9WUA3	10	10	6	4.07173e+07	9.59836e+06	2.39475e+07
Alcam	Q61490	6	4	6	4.06819e+07	1.01604e+07	3.75733e+07
Eif3b	Q8JZQ9	6	5	4	4.03523e+07	8.9493e+06	9.16255e+07
Eif3c	Q8R1B4	9	9	6	4.01785e+07	4.16995e+07	170010922
Gstp1	P19157	4	4	4	4.005e+07	1.04299e+07	9.80197e+07
Rasa3	Q60790	8	7	8	3.97958e+07	4.04523e+07	5.32081e+08
Uckl1	Q91YL3	11	11	4	3.9631e+07	3.0634e+07	2.16153e+06
Syngr2	O55101	1	1	2	3.94962e+07	7.073e+06	1.69235e+07
Rpl19	P84099	4	3	3	3.92249e+07	1.03078e+07	3.29283e+07
Usp5	P56399	3	3	1	3.9214e+07	4.40958e+06	1.43824e+06
Lnpep	Q8C129	10	9	7	3.89088e+07	1.90118e+07	4.93901e+07
Cd53	Q61451	2	2	2	3.87936e+07	2.05815e+06	1.67592e+07
Sf3b3	Q921M3	3	3	3	3.87934e+07	4.60492e+07	3.71792e+08
Mmp19	Q9JHI0	5	5	3	3.80592e+07	5.15013e+07	3.0895e+06
Krt16	Q9Z2K1	4	6	6	3.79755e+07	2.86658e+07	1.62602e+08
Vps33a	Q9D2N9	5	5	4	3.77198e+07	1.32756e+07	6.54295e+06
Ephx1	Q9D379	5	2	3	3.72868e+07	2.7111e+06	1.28608e+07
Ecm1	Q61508	4	4	4	3.71923e+07	5.66521e+07	3.4243e+06
Il1rn	P25085	3	2	3	3.71897e+07	3.70506e+06	1.09372e+07
Srgap2	Q91Z67	7	6	4	3.69312e+07	6.65306e+06	1.38395e+07
Iars	Q8BU30	11	10	7	3.68793e+07	2.29022e+07	3.23002e+07
Rpl10a	P53026	3	3	2	3.67452e+07	1.53879e+07	6.81789e+06
Ifi204	P15092	7	7	4	3.67389e+07	3.47455e+07	1.40702e+07
Hck	P08103	9	9	5	3.6725e+07	4.15406e+07	1.66743e+07
A2m	Q61838	2	2	1	3.66654e+07	1.75539e+07	1.98124e+07
Aqp1	Q02013	2	2	1	3.65939e+07	4.12434e+06	64104.9
Rap2b	P61226	4	3	5	3.65485e+07	3.34571e+06	4.06599e+07
Rplp0	P14869	6	6	6	3.65318e+07	1.07942e+07	3.60116e+07
Acly	Q91V92	10	10	7	3.65234e+07	2.3194e+07	8.62184e+07
Col6a2	Q02788	5	4	4	3.64317e+07	4.11901e+06	1.93179e+07
Wars	P32921	5	5	4	3.62703e+07	1.55073e+07	1.16433e+07
Snrpd3	P62320	2	1	1	3.62657e+07	49077.2	6.53356e+06
Tm9sf4	Q8BH24	5	5	4	3.59485e+07	9.37426e+06	3.63259e+06
Gclm	O09172	3	2	2	3.57974e+07	7.71708e+07	575626
Gda	Q9R111	2	1	1	3.57248e+07	8.74959e+06	1.02296e+06
Rps23	P62267	3	2	1	3.55626e+07	1.50833e+06	3.35039e+06
Aldh2	P47738	9	7	4	3.54851e+07	1.22671e+07	9.44829e+06
Isg15	Q64339	3	3	2	3.51065e+07	6.7361e+07	5.46615e+06
Cst3	P21460	2	1	2	3.48104e+07	3.94649e+06	3.7322e+06
Ass1	P16460	4	4	3	3.4585e+07	3.19181e+06	2.06869e+07
Ap3d1	O54774	7	8	6	3.44511e+07	7.88754e+06	3.4089e+07
Capns1	O88456	3	4	3	3.43539e+07	8.3995e+06	1.69739e+07
Rpl24	Q8BP67	3	3	2	3.4297e+07	9.55734e+06	2.73192e+06
Plxnb2	B2RXS4	10	10	9	3.42044e+07	2.63167e+07	2.57321e+08
Tspan4	Q9DCK3	2	1	2	3.41893e+07	23830.3	5.2858e+06
Prkcd	P28867	8	3	3	3.40865e+07	5.99445e+06	5.70052e+07
Pdxk	Q8K183	9	9	6	3.39687e+07	1.89164e+07	1.02996e+08
Psma3	O70435	4	4	3	3.37478e+07	1.50032e+07	5.96461e+07
Dsp	E9Q557	10	10	8	3.37138e+07	3.51929e+07	6.71689e+08
Pi4k2a	Q2TBE6	7	6	5	3.37022e+07	1.54651e+07	7.98155e+06
Cd37	Q61470	4	2	2	3.35498e+07	5.55478e+06	2.56743e+07
Aprt	P08030	5	4	4	3.35339e+07	4.4708e+06	2.41279e+07
Krt17	Q9QWL7	5	5	6	3.33162e+07	1.92779e+07	5.23424e+07
Adssl1	P28650	3	3	3	3.32578e+07	1.51586e+07	1.53372e+06
Mthfd1	Q922D8	8	6	3	3.31784e+07	2.60619e+07	2.48129e+08
Abhd12	Q99LR1	10	8	4	3.29441e+07	9.93369e+06	1.5935e+07
Ranbp1	P34022	3	1	2	3.2796e+07	1.79212e+06	6.69421e+06
Dbi	P31786	4	3	1	3.26059e+07	4.7003e+06	32164.8
Clec7a	Q6QLQ4	3	2	3	3.25373e+07	9.46535e+06	8.23663e+06
Galk1	Q9R0N0	4	4	2	3.2392e+07	7.17506e+08	6.0181e+06
Rpl8	P62918	3	2	2	3.22614e+07	6.92625e+06	3.63302e+07
Rps13	P62301	6	5	5	3.22272e+07	6.08341e+06	1.362e+07
Arf4	P61750	3	3	3	3.20607e+07	2.52412e+06	2.55835e+07
Tmed9	Q99KF1	3	4	2	3.20561e+07	1.54539e+07	3.11849e+06
Fcgr3	P08508	2	2	2	3.1727e+07	1.45812e+06	2.37013e+06
Ifit1	Q64282	10	8	2	3.16161e+07	1.23662e+07	255767
Ppp2ca	P63330	4	4	4	3.14908e+07	5.66146e+06	4.83981e+06
St13	Q99L47	4	4	3	3.14242e+07	2.09269e+07	1.24339e+07
Vamp3	P63024	6	5	4	3.13061e+07	9.86647e+06	4.91706e+07
Rpl18a	P62717	4	3	2	3.13024e+07	4.24624e+06	1.06509e+07
Slc44a1	Q6X893	6	5	3	3.11402e+07	5.30067e+06	1.03025e+07
Dhx15	O35286	7	7	5	3.08713e+07	1.35641e+07	2.42947e+08
Actr1a	P61164	7	6	4	3.06925e+07	6.71103e+06	2.16335e+07
Psma6	Q9QUM9	4	3	4	3.06533e+07	1.33577e+07	2.42593e+07
Actn4	P57780	8	8	7	3.04687e+07	2.19418e+07	129323496
Vdac2	Q60930	5	5	3	3.04661e+07	2.6913e+07	6.61069e+06
Snrpd2	P62317	3	3	3	3.03873e+07	2.31445e+07	386301523
Plscr1	Q9JJ00	3	1	3	3.0384e+07	811781	5.18602e+06
Fabp4	P04117	3	3	2	3.02157e+07	1.39344e+06	6.96345e+06
Gsta1	P13745	3	3	1	3.01459e+07	5.56915e+07	3.69089e+06
Gsr	P47791	3	3	2	3.0114e+07	2.7382e+07	1.02941e+07
Galnt6	Q8C7U7	6	6	5	2.997e+07	2.15202e+07	1.23873e+07
Rab21	P35282	4	4	2	2.9895e+07	1.63819e+07	4.50914e+07
Capn5	O08688	7	7	7	2.98889e+07	1.96643e+07	4.98283e+08
Srsf3	P84104	3	3	1	2.96687e+07	7.63731e+06	1.58221e+07
Ms4a1	P19437	3	2	2	2.96313e+07	5.26604e+06	2.52334e+06
Chmp6	P0C0A3	2	2	2	2.96096e+07	2.56189e+06	6.83368e+06
Hint1	P70349	3	2	2	2.941e+07	6.65157e+06	4.84263e+07
Dnaja2	Q9QYJ0	8	4	4	2.93846e+07	1.71938e+07	5.58388e+06
Nckap1	P28660	2	2	2	2.92407e+07	8.57606e+06	1.25044e+07
Gm2a	Q60648	3	2	3	2.9222e+07	5.40485e+06	2.52081e+07
H2-Aa	P14434	3	2	3	2.90932e+07	136592	6.37025e+06
Tmem106a	Q8VC04	3	3	2	2.9057e+07	9.63534e+06	2.08502e+07
Cd300lh	Q6SJQ5	2	2	2	2.90222e+07	5.11145e+06	2.37704e+06
Copg1	Q9QZE5	4	4	4	2.89221e+07	1.17811e+07	3.45496e+07
Nrp1	P97333	9	6	4	2.88732e+07	3.88683e+06	7.7729e+07
Eif3f	Q9DCH4	7	6	4	2.87651e+07	1.91706e+06	7.00118e+07
Scarb1	Q61009	2	2	2	2.86155e+07	1.65092e+06	2.82156e+07
Hmgb1	P63158	6	8	3	2.85303e+07	2.37833e+07	3.56933e+06
Ncl	P09405	8	7	3	2.82833e+07	1.85341e+07	2.39034e+07
Hist1h1a	P43275	1	2	1	2.81613e+07	4.52475e+06	1.18692e+07
Kif5b	Q61768	9	8	6	2.80601e+07	2.06843e+07	2.48998e+08
Pip4k2a	O70172	6	6	4	2.78555e+07	2.80289e+07	3.52704e+07
C5ar1	P30993	1	2	1	2.78522e+07	6.81115e+06	1.34922e+07
Evi2a	P20934	3	3	2	2.78052e+07	3.29818e+06	1.32004e+07
Ugdh	O70475	7	7	4	2.77718e+07	1.73854e+07	1.39215e+06
Mgat2	Q921V5	6	6	3	2.77186e+07	1.2111e+07	9.38143e+06
Ptp4a3	Q9D659	4	4	2	2.76448e+07	1.78916e+07	3.64298e+06
Apob	E9Q414	5	5	4	2.76298e+07	5.18564e+07	1.13682e+07
Rftn1	Q6A0D4	8	5	5	2.75793e+07	4.99105e+06	4.25743e+07
Ca1	P13634	4	4	2	2.75258e+07	7.2374e+06	4.4469e+06
Nop56	Q9D6Z1	7	7	2	2.73586e+07	1.00329e+07	784653
Rab6a	P35279	4	3	2	2.73529e+07	7.81036e+06	1.11131e+07
Gnpda1	O88958	4	5	4	2.7272e+07	9.29095e+06	1.39735e+07
F13a1	Q8BH61	6	2	4	2.68983e+07	1.85925e+06	8.60223e+06
Snap23	O09044	4	4	4	2.68845e+07	3.02892e+06	9.52316e+07
Ostf1	Q62422	4	5	3	2.6863e+07	1.50415e+07	2.05074e+07
Marcks	P26645	3	4	5	2.67872e+07	3.10392e+07	7.21505e+07
Psma4	Q9R1P0	3	1	3	2.63829e+07	1.62276e+07	1.6301e+07
Nap1l1	P28656	5	4	3	2.63014e+07	8.53169e+06	2.94786e+06
Tmem165	P52875	3	2	1	2.62887e+07	5.18372e+06	4.54462e+06
Rpn2	Q9DBG6	4	4	1	2.60062e+07	3.2707e+07	5.76464e+06
Tardbp	Q921F2	4	4	2	2.58885e+07	9.574e+06	1.60057e+07
Rpl9	P51410	4	4	3	2.58759e+07	8.85843e+06	3.20899e+07
Slc9a3r1	P70441	5	3	6	2.58174e+07	2.88419e+07	7.52588e+07
Chmp3	Q9CQ10	4	3	2	2.56128e+07	3.49561e+06	8.73443e+06
Mpo	P11247	5	5	5	2.55746e+07	1.75383e+07	5.99154e+06
Csk	P41241	7	6	4	2.54895e+07	2.70755e+07	2.40548e+07
Rps26	P62855	2	2	2	2.54495e+07	3.77913e+07	2.07372e+07
Fam20b	Q8VCS3	2	2	1	2.52924e+07	4.29867e+07	4.95858e+06
Dnm1l	Q8K1M6	7	5	4	2.52705e+07	9.53913e+06	2.12077e+07
Ugp2	Q91ZJ5	10	8	4	2.51118e+07	6.85084e+06	5.36605e+06
Rpn1	Q91YQ5	10	9	7	2.51094e+07	3.50865e+07	3.73224e+07
Rap2c	Q8BU31	4	2	4	2.47869e+07	376775	1.49224e+07
Stx12	Q9ER00	3	3	3	2.46691e+07	6.98265e+06	1.41624e+08
Hist2h2aa1	Q6GSS7	4	3	3	2.46468e+07	4.20446e+06	1.15399e+07
Rplp2	P99027	5	3	4	2.45272e+07	2.17927e+06	2.25055e+07
Abi1	Q8CBW3	5	4	4	2.45015e+07	1.83563e+07	3.97544e+07
Cyb5r3	Q9DCN2	7	7	3	2.44782e+07	2.24532e+07	2.51805e+07
Dab2	P98078	7	7	4	2.4384e+07	1.8748e+07	2.88135e+07
Rps7	P62082	2	1	2	2.43823e+07	7756.47	8.75734e+07
Tollip	Q9QZ06	2	2	1	2.42631e+07	3.03528e+07	3.04217e+07
S100a4	P07091	2	3	2	2.42585e+07	5.63748e+06	8.8273e+07
Snrpb	P27048	3	3	2	2.42035e+07	6.27248e+06	8.48349e+06
Rap1a	P62835	2	2	3	2.41241e+07	3.16215e+06	1.22438e+08
Aldh9a1	Q9JLJ2	7	7	7	24019455	1.26129e+07	4.36912e+07
Ugt1a7c	Q6ZQM8	5	3	0	2.38525e+07	2.53267e+06	0
Slc6a6	O35316	2	1	1	2.37789e+07	2.75609e+06	18900.8
Atp6v0c	P63082	1	1	2	2.37225e+07	1.25039e+06	6.61647e+07
Dnaja1	P63037	5	3	3	2.37202e+07	1.82464e+07	5.17075e+08
Rps20	P60867	2	2	0	2.3563e+07	1.9771e+06	0
Gvin1	Q80SU7	9	9	6	2.34684e+07	10774040	6.87723e+07
Park7	Q99LX0	5	4	3	2.33912e+07	1.51657e+07	2.24326e+07
S100a6	P14069	2	2	2	2.33508e+07	4.63828e+08	1.98454e+06
Sacm1l	Q9EP69	8	9	6	2.30445e+07	2.14289e+07	4.97827e+06
Emr1	Q61549	4	4	4	2.30279e+07	1.58338e+07	1.1097e+08
Farsa	Q8C0C7	9	6	6	2.30258e+07	1.89142e+07	3.96579e+06
Atg7	Q9D906	10	8	5	2.29755e+07	1.20692e+07	1.65718e+07
Pcbp2	Q61990	2	2	2	2.28982e+07	3.00446e+06	3.79296e+06
Picalm	Q7M6Y3	7	7	6	2.28557e+07	1.19916e+07	1.95004e+07
Fut8	Q9WTS2	7	6	3	2.27316e+07	1.54904e+07	1.74896e+07
Sf3b1	Q99NB9	4	4	4	2.26161e+07	2.22935e+07	2.04832e+07
Psma5	Q9Z2U1	3	3	1	2.25049e+07	1.51715e+07	518318
Igfbp4	P47879	1	2	2	2.24799e+07	1.33581e+07	3.08739e+08
Dbnl	Q62418	9	8	6	2.24673e+07	1.22147e+07	2.56433e+08
Cbr3	Q8K354	2	2	1	2.24343e+07	1.34751e+07	2.89082e+07
Tpt1	P63028	4	2	2	22392164	885229	3.44199e+06
Cd200r1	Q9ES57	2	0	1	2.23506e+07	0	2.0869e+07
Lman1	Q9D0F3	5	5	2	2.23367e+07	1.86207e+07	1.39845e+07
Thbs4	Q9Z1T2	5	4	1	2.22395e+07	2.37926e+07	4.00026e+07
Mars	Q68FL6	4	3	3	2.21267e+07	1.39008e+07	9.77006e+06
Pacsin2	Q9WVE8	7	6	5	2.20313e+07	4.32595e+06	1.94752e+06
Elavl1	P70372	4	4	1	2.19902e+07	1.66703e+07	3.18547e+06
Snf8	Q9CZ28	3	3	3	2.19587e+07	1.54122e+07	1.27997e+07
Raly	Q64012	4	4	3	2.19513e+07	1.1414e+07	1.91118e+07
Evi2b	Q8VD58	2	2	1	2.19311e+07	896658	8.63671e+07
Cltb	Q6IRU5	2	2	2	2.17184e+07	6.60633e+06	4.74777e+07
Nptn	P97300	3	3	3	2.16707e+07	5.94474e+06	1.31374e+07
Ap1g1	P22892	4	4	2	2.15527e+07	5.96911e+06	4.80525e+07
Chmp2a	Q9DB34	4	5	3	2.15214e+07	2.33373e+07	4.15774e+07
Cnp	P16330	5	5	2	2.14676e+07	6.40568e+06	1.66977e+07
Mgat1	P27808	6	5	4	2.14467e+07	9.26962e+06	1.07266e+07
Eef1b	O70251	3	3	3	2.12072e+07	1.24072e+07	1.00955e+07
Was	P70315	3	3	3	2.12051e+07	1.64416e+07	2.3474e+06
Lrp1	Q91ZX7	7	6	5	2.11671e+07	1.5696e+07	3.13421e+07
Psmd8	Q9CX56	4	4	1	2.106e+07	1.29286e+07	1.27418e+06
Mif	P34884	2	2	2	2.09052e+07	1.40639e+07	1.54498e+07
Kctd12	Q6WVG3	6	7	7	2.08948e+07	1.41092e+07	5.42518e+07
Rpl34	Q9D1R9	3	3	3	2.08276e+07	3.71738e+06	1.52096e+07
Hp	Q61646	2	1	1	2.0804e+07	1.98934e+06	3.15614e+06
Trappc3	O55013	3	2	2	2.07637e+07	5.732e+06	267286561
Plp2	Q9R1Q7	2	1	3	2.07635e+07	2.91438e+07	2.19056e+07
Hsd17b11	Q9EQ06	5	5	1	2.04362e+07	4.49767e+06	7.75912e+06
Lsm4	Q9QXA5	2	2	0	2.04052e+07	2.6683e+07	0
Psme1	P97371	4	3	3	2.0404e+07	6.99409e+06	1.01019e+07
Slc39a10	Q6P5F6	1	2	1	2.04007e+07	1.82536e+07	1.06845e+06
Adsl	P54822	2	2	0	2.03994e+07	4.25619e+06	0
Clec12a	Q504P2	5	4	5	2.03812e+07	1.74415e+07	2.75356e+07
Sarnp	Q9D1J3	4	6	4	2.03653e+07	3.20458e+07	8.44593e+06
Paics	Q9DCL9	5	6	5	2.03115e+07	1.23259e+07	2.08451e+07
Uso1	Q9Z1Z0	4	3	2	2.03028e+07	7.7571e+06	1.39345e+06
Icam1	P13597	3	2	3	2.02992e+07	1.71041e+06	7.42731e+07
Rasa4	Q6PFQ7	2	4	3	2.02924e+07	5.6063e+06	2.87974e+07
Gars	Q9CZD3	6	4	6	2.02395e+07	3.23655e+07	8.3273e+06
Psmb3	Q9R1P1	4	2	3	2.02278e+07	2.31142e+06	2.60769e+07
Tm9sf2	P58021	5	4	2	2.01107e+07	4.18266e+06	1.02947e+07
Vta1	Q9CR26	5	2	3	2.00879e+07	2.52194e+06	4.27832e+07
Dclk3	Q8BWQ5	2	1	2	2.00356e+07	7.30672e+06	6.85967e+06
Fam3c	Q91VU0	3	3	3	1.99786e+07	5.76334e+06	2.31463e+07
Slc2a3	P32037	2	1	2	1.99182e+07	1.9031e+07	1.5972e+07
Ccl2	NA	2	2	2	1.97265e+07	1.23263e+07	5.48605e+07
Colec10	Q8CF98	2	1	1	1.97061e+07	1.11916e+08	1.92634e+06
Cd72	P21855	3	3	3	1.97011e+07	9.72838e+06	2.18465e+06
Ube2d3	P61079	2	2	2	1.94062e+07	4.04927e+06	4.00945e+07
Mdh2	P08249	4	3	3	1.93433e+07	5.42712e+06	5.1547e+06
Rab5b	P61021	4	4	2	1.92896e+07	1.52079e+07	4.27463e+07
Bin2	D3Z6Q9	4	4	2	1.9199e+07	1.28583e+07	5.11252e+06
Ap2s1	P62743	3	3	3	1.91274e+07	1.05286e+06	2.19383e+06
Itga2	Q62469	4	3	3	1.90574e+07	2.50933e+06	9.06741e+06
Bcap31	Q61335	4	4	2	1.90363e+07	3.01585e+06	2.99694e+06
Psma2	P49722	6	5	3	18962944	5.06696e+06	5.15114e+06
Pik3c2a	Q61194	3	3	3	1.89175e+07	2.70042e+06	4.52336e+06
Taok3	Q8BYC6	5	4	3	1.88274e+07	3.15517e+06	5.14675e+06
Impdh2	P24547	5	5	3	1.87724e+07	1.09224e+07	6.74465e+06
Ruvbl2	Q9WTM5	6	5	2	1.87669e+07	6.34298e+06	2.38394e+06
Apbb1ip	Q8R5A3	2	2	2	1.87393e+07	2.18144e+06	4.01112e+06
Hpcal1	P62748	4	3	4	1.86849e+07	2.68604e+07	2.82609e+07
Arhgap17	Q3UIA2	6	5	5	1.8395e+07	1.91966e+07	8.34978e+07
Casp1	P29452	4	4	2	1.82811e+07	1.19966e+07	1.53783e+07
Fbl	P35550	4	4	3	1.81507e+07	5.39039e+07	8.18297e+06
Lcat	P16301	2	2	2	1.80723e+07	3.23346e+07	1.84778e+07
Myadm	O35682	2	1	2	18011621	3.3478e+06	5.14088e+07
Coro7	Q9D2V7	6	6	4	1.79455e+07	7.62817e+06	5.07244e+07
Ppp1ca	P62137	5	5	3	1.79176e+07	1.42395e+07	2.61846e+06
Spn	P15702	3	2	3	1.78542e+07	4.37599e+06	8.11158e+06
Fam129a	Q3UW53	5	4	4	1.78504e+07	7.16802e+06	5.57826e+06
Ano6	Q6P9J9	5	5	0	1.77197e+07	6.37473e+06	0
C3ar1	O09047	3	2	3	1.7575e+07	4.34521e+06	1.18545e+07
Rnpep	Q8VCT3	7	6	2	1.74711e+07	1.72742e+07	5.36938e+07
Stambp	NA	5	3	1	1.74535e+07	7.78661e+07	1.3507e+06
Rtcb	Q99LF4	6	6	3	1.74435e+07	1.45034e+07	1.58025e+06
S100a11	P50543	5	4	5	1.73836e+07	1.06627e+07	3.61806e+07
Selenbp2	NA	5	4	4	1.7221e+07	6.96292e+06	3.34861e+06
Hmha1	Q3TBD2	4	4	3	1.70936e+07	4.06952e+07	1.50802e+06
H2-Ab1	P14483	3	1	3	1.6997e+07	456287	2.69964e+07
Psmd5	Q8BJY1	6	5	2	1.69962e+07	1.32982e+07	4653030406
Syncrip	Q7TMK9	5	5	2	1.6887e+07	1.07231e+07	1.03807e+08
Ncf1	Q09014	5	6	3	1.68234e+07	1.5965e+07	1.12947e+08
Dync1li1	Q8R1Q8	5	5	1	1.6799e+07	5.39812e+06	134739
Nras	P08556	2	2	1	1.66083e+07	3.70289e+06	1.52148e+06
Rac1	P63001	2	4	2	1.66072e+07	1.67035e+07	7.17583e+07
Copb2	O55029	6	6	4	1.65894e+07	1.83025e+07	6.81619e+07
Ddx17	Q501J6	6	6	5	1.65603e+07	1.84407e+07	4.72163e+06
Rp2	Q9EPK2	4	3	4	1.65236e+07	4.91695e+06	2.39368e+07
Rps24	P62849	2	2	2	1.6466e+07	171165	5.83484e+06
Gnb1	P62874	4	4	3	1.63931e+07	2.05895e+06	6.24687e+07
Ankfy1	Q810B6	6	7	1	1.63907e+07	3.99933e+06	41458.8
Chmp1a	Q921W0	3	2	3	1.6353e+07	1.70469e+07	1.29458e+07
Acsl4	Q9QUJ7	5	3	5	1.63408e+07	2.23192e+06	1.28948e+08
Psmb8	P28063	3	3	3	1.62979e+07	3.64206e+06	9.56693e+06
Mbnl1	Q9JKP5	3	2	1	1.62265e+07	1.12061e+07	847276
Adh5	P28474	3	3	3	1.60849e+07	4.04332e+06	6.84454e+06
Sars	P26638	4	4	2	1.6019e+07	9.55566e+06	1.19283e+06
Nrp2	NA	4	2	5	1.60036e+07	9.84185e+06	2.49479e+07
Gpx1	P11352	3	3	3	1.59887e+07	1.85073e+07	2.54056e+08
Nampt	Q99KQ4	6	5	3	1.58195e+07	2.06663e+07	103687
Dnpep	Q9Z2W0	5	3	5	1.57622e+07	5.60867e+07	1.23489e+07
Myo9b	Q9QY06	3	4	2	1.57219e+07	2.69161e+07	2.83001e+06
Ptpn11	P35235	5	5	2	1.56945e+07	7.36863e+06	7.04614e+06
Ctsa	P16675	4	3	4	1.5683e+07	2.02125e+07	2.22104e+07
Matr3	Q8K310	4	3	3	1.56821e+07	7.26455e+06	4.14653e+07
Dusp3	Q9D7X3	3	2	3	1.56481e+07	1.14157e+07	3.1204e+08
Hspg2	Q05793	5	5	5	1.56346e+07	1.67611e+07	1.03694e+08
Ddx1	Q91VR5	3	3	2	1.5602e+07	7.83925e+06	5.81591e+08
Adk	P55264	2	2	1	1.55963e+07	2.87243e+06	311845
Gnai3	Q9DC51	5	3	3	1.55751e+07	4.58589e+06	4.17314e+07
C1ra	Q8CG16	3	3	2	1.54719e+07	5.36734e+06	802939
Rbbp4	Q60972	4	3	2	1.51691e+07	1.71742e+06	4.44009e+06
Acp2	P24638	4	5	2	1.49516e+07	2.06394e+07	1.31498e+07
Srsf5	O35326	4	4	2	1.4867e+07	3.22096e+07	5.28721e+06
Dnajc3	Q91YW3	4	4	2	1.48417e+07	1.52972e+07	318470
Cpne2	P59108	3	3	2	1.48053e+07	4.99823e+06	1.43668e+06
Eif4a3	Q91VC3	5	5	3	1.47414e+07	7.65664e+06	7.50446e+06
Cr1l	Q64735	3	2	3	1.45665e+07	5.82859e+06	1.05554e+07
Surf1	P09925	2	2	1	1.44694e+07	1.1197e+08	1.3248e+06
Slc25a3	Q8VEM8	2	2	2	1.43986e+07	9.10832e+06	6073016657
Fam168a	Q8BGZ2	2	2	1	1.43865e+07	1.16628e+06	2.54045e+06
Lpxn	Q99N69	3	3	2	1.43218e+07	2.12514e+06	3.92634e+06
2016-09-02	P42208	3	3	2	1.42245e+07	7.16998e+06	1.83667e+07
Snd1	Q78PY7	5	5	5	1.41995e+07	6.33574e+06	6.24704e+07
Vamp8	O70404	3	3	2	1.41494e+07	2.48346e+06	4.87219e+07
Itgal	P24063	4	4	4	1.41381e+07	2.35257e+07	4.39532e+08
Snx9	Q91VH2	5	4	2	1.41151e+07	6.52993e+06	1.09074e+06
Fam49b	Q921M7	3	2	2	1.40919e+07	835423	8.11003e+06
Hnrnpa1	P49312	5	7	4	1.40314e+07	1.7759e+07	1.77849e+06
Hspb1	P14602	2	2	0	1.39565e+07	5.22702e+06	0
Rras	P10833	3	3	3	1.38616e+07	1.73544e+06	3.83697e+06
Rpl30	P62889	2	2	0	1.3825e+07	5.98526e+06	0
Rps14	P62264	2	2	1	1.37405e+07	6.18736e+06	1.5513e+07
Tmed4	Q8R1V4	3	4	2	1.36638e+07	5.19786e+06	38551231
Psme2	P97372	3	1	3	1.36291e+07	1.14052e+06	3.60008e+07
Slc6a4	Q60857	2	2	1	1.36165e+07	680402	482060
Yars	Q91WQ3	4	4	2	1.35085e+07	7.10184e+06	20366
Pygb	Q8CI94	5	5	5	1.34615e+07	1.60368e+06	3.97778e+06
Comt	NA	2	1	1	1.34487e+07	6.27157e+06	1.9525e+06
Psmd14	O35593	2	3	2	1.33555e+07	7.55903e+06	1.31929e+07
Tra2b	P62996	3	1	2	1.33435e+07	1.78529e+06	4.32873e+08
Krt14	Q61781	5	5	2	1.33424e+07	1.6194e+06	1.38149e+07
Anp32b	Q9EST5	2	2	2	13277726	1.00991e+06	8.17334e+06
Txndc17	Q9CQM5	2	2	1	1.32676e+07	207667	56648.4
Pepd	Q11136	4	5	2	1.32571e+07	7.10059e+06	1.934e+06
Ly9	Q01965	5	2	1	1.32104e+07	1.01217e+06	550225
Prpf40a	Q9R1C7	3	3	3	1.31337e+07	7.06459e+06	7.09204e+06
Ppib	P24369	3	2	2	1.30713e+07	964678	4.85513e+08
Cnn2	Q08093	1	3	2	1.2764e+07	7.53058e+06	8.0098e+06
Xdh	Q00519	5	5	3	1.26957e+07	1.83345e+07	9.22879e+07
Ctps2	P70303	3	2	2	1.26887e+07	3.44625e+06	8.81414e+06
Dag1	Q62165	2	2	1	1.26278e+07	1.52971e+07	3.78309e+06
Tpp1	O89023	2	1	1	1.25924e+07	5.14313e+06	7.08375e+06
B3gnt2	NA	2	2	1	1.2558e+07	2.52109e+06	1.04273e+06
Glipr2	Q9CYL5	1	2	2	1.25295e+07	4.79841e+06	1.22586e+08
Myo5a	Q99104	4	5	1	1.25204e+07	1.0805e+07	1.34537e+07
Vnn1	Q9Z0K8	2	2	1	1.24055e+07	9.29965e+06	1.75139e+07
Fkbp15	Q6P9Q6	3	3	1	1.23829e+07	1.82851e+07	1.96982e+06
Rps10	P63325	2	2	1	1.23739e+07	585403	1.0576e+07
Bsg	P18572	3	2	2	1.23285e+07	2.2937e+06	7.25162e+06
Lman2	Q9DBH5	2	2	0	1.23131e+07	3.75756e+06	0
Hp1bp3	Q3TEA8	3	3	2	1.22897e+07	1.26219e+07	2.95096e+06
Rpl23a	P62751	2	2	1	1.2272e+07	3.48803e+06	169963
Fgl2	P12804	4	5	4	1.22036e+07	1.6595e+07	6064036
Napsa	O09043	2	2	1	1.21211e+07	7.16182e+06	673940
Kcnab2	P62482	2	0	1	1.20371e+07	0	2.20881e+06
Pelp1	Q9DBD5	3	3	3	1.20342e+07	2.65858e+06	2.25756e+07
Epb41l2	O70318	4	4	4	1.2022e+07	3.4471e+07	3.51703e+07
Ccr1	P51675	1	1	2	1.20047e+07	1.03205e+06	3.47961e+06
Rps5	P97461	3	3	3	1.19432e+07	6.81586e+06	7.03548e+06
Arg1	Q61176	3	4	2	1.1934e+07	4.76843e+06	1.66046e+07
Scamp1	Q8K021	2	2	2	1.19331e+07	5.28481e+06	1.11155e+07
Stx4	P70452	2	0	1	1.19321e+07	0	236773
2016-09-07	O55131	2	2	2	1.18677e+07	2.56242e+07	2.42833e+07
Vtn	P29788	3	3	2	1.18074e+07	3.57445e+07	4.74584e+07
Aimp2	Q8R010	4	2	2	1.17898e+07	2.12663e+06	4.77667e+07
Atp6v1d	P57746	4	4	1	1.17162e+07	1.14672e+07	5.6953e+06
Mta2	Q9R190	5	4	4	1.16256e+07	46260848	9.58338e+06
Atp6ap1	Q9R1Q9	2	2	1	1.15694e+07	563625	3.94491e+06
Golga5	Q9QYE6	3	3	2	1.15574e+07	7.97137e+06	535937
Hmgb2	P30681	5	4	0	1.14709e+07	6.73157e+07	0
Smap2	Q7TN29	2	2	1	1.14069e+07	1.86792e+06	511236
Xpnpep1	Q6P1B1	4	4	2	1.13144e+07	3.79612e+06	8.85121e+06
Clint1	Q99KN9	4	4	2	1.1191e+07	16555207	1.40363e+07
Twf1	Q91YR1	3	2	2	1.11332e+07	1.83223e+07	7.74626e+06
Dhfr	P00375	2	2	1	1.11111e+07	3.46315e+06	2.83689e+07
Hexb	P20060	3	3	2	1.10209e+07	7.75622e+06	6.3446e+06
Vps4a	Q8VEJ9	4	2	1	1.09899e+07	681344	2.04493e+06
Ap3m1	Q9JKC8	2	1	0	1.09879e+07	401593	0
Creg1	O88668	2	2	1	1.09594e+07	1.12622e+06	763445
Naca	P70670	2	2	0	1.09211e+07	4.30801e+06	0
Pkn1	P70268	1	2	1	1.09022e+07	1.57271e+07	2.08644e+06
Cct6b	Q61390	2	2	0	1.08749e+07	2.71491e+06	0
Srrm1	Q52KI8	3	2	0	1.08298e+07	3.12261e+06	0
2016-09-11	Q8C1B7	2	1	1	1.07995e+07	504425	176814
Snrpg	P62309	2	2	1	1.07451e+07	264060	5.47987e+06
Slc43a2	NA	2	2	2	1.06686e+07	713937	2.21904e+07
Lgals9	O08573	2	1	2	1.06633e+07	4.53574e+06	1.44887e+07
Mcm3	P25206	3	4	2	1.06361e+07	9.10382e+06	2.07633e+06
Flnb	Q80X90	3	3	2	1.04942e+07	4.4325e+07	1.78961e+07
Hpgds	Q9JHF7	2	2	1	1.03841e+07	1.65597e+07	2.49723e+06
Hsd17b4	P51660	2	2	2	1.03722e+07	1.74296e+06	6.33171e+06
Asna1	O54984	3	3	3	1.02708e+07	3.40901e+06	7.39233e+06
Rab31	Q921E2	2	2	2	1.02664e+07	1.33234e+08	9.50124e+06
Cmpk2	Q3U5Q7	2	2	2	1.02489e+07	5.53952e+06	1.42579e+07
Acat2	Q8CAY6	3	1	1	1.02102e+07	469704	5.19881e+06
Sf3a3	Q9D554	4	4	1	1.01915e+07	7.27764e+06	31762.5
Npy	P57774	2	2	1	1.01904e+07	3.41892e+06	3.00496e+06
Otub1	Q7TQI3	3	2	0	1.0172e+07	1.32998e+06	0
Rps19	Q9CZX8	3	2	1	1.01699e+07	3.86253e+06	2.52322e+06
Tmed2	Q9R0Q3	3	2	1	1.00926e+07	3.31508e+06	780898
Pdcd10	Q8VE70	3	0	2	1.00921e+07	0	6.53814e+06
Ddx19a	Q61655	3	2	3	1.00869e+07	5.50932e+06	5.02462e+06
Fyb	O35601	2	2	2	1.00093e+07	2.74221e+06	1.58286e+07
Psmb1	O09061	2	1	1	9.99412e+06	2.16264e+06	412870
Nek7	NA	2	1	2	9.98016e+06	1.21936e+07	8.03275e+06
Olfml3	Q8BK62	2	3	1	9.86725e+06	1.27166e+07	11136
Tbxas1	P36423	5	6	1	9.85825e+06	6.28548e+06	2900.67
Ergic3	Q9CQE8	2	2	2	9.8298e+06	6.54256e+06	2.05596e+07
Clec4a	Q9QZ15	3	2	2	9.82913e+06	1.86833e+07	6.80108e+07
Igf1	P05017	2	2	2	9.80552e+06	8.34008e+06	789428
Tlr7	P58681	4	4	2	9.72465e+06	1.04413e+07	60878
Lars	Q8BMJ2	5	5	4	9.68102e+06	2.17626e+07	3.88499e+06
Slc16a1	P53986	2	2	1	9.66501e+06	6.0641e+06	177383
Pak2	Q8CIN4	2	1	1	9.61736e+06	7.67145e+06	7.25921e+06
Lamc1	P02468	1	2	3	9.59615e+06	633709	8.72247e+07
Api5	O35841	5	5	3	9.54856e+06	18712692	802214
Cycs	P62897	3	2	3	9.49454e+06	8.12268e+06	4.45333e+06
Vapa	Q9WV55	3	3	2	9.47316e+06	3.05008e+07	172119
Eml2	Q7TNG5	2	1	1	9.43782e+06	6.21563e+06	1.22529e+06
Plcg2	Q8CIH5	3	3	1	9.43247e+06	1.3427e+07	4.8863e+06
Sptan1	P16546	2	2	1	9.41779e+06	4.49947e+06	2.08502e+07
Ssb	P32067	4	3	2	9.4065e+06	890728	2.02817e+07
Mat2a	Q3THS6	3	3	2	9.35804e+06	7.95562e+06	4.75517e+06
Insrr	Q9WTL4	2	2	2	9.31191e+06	8.13151e+06	6.9993e+06
Rpl35a	O55142	2	2	1	9.30649e+06	4.95872e+06	2.86767e+06
Rplp1	P47955	2	2	2	9.26617e+06	2.00981e+06	7.52689e+06
Itih1	Q61702	2	2	2	9.22992e+06	2.12024e+07	4.93031e+07
Rdx	P26043	4	5	2	9.13684e+06	5.56984e+06	13111337
Wdr26	Q8C6G8	4	3	2	9.05979e+06	2.82324e+06	4.34472e+07
Umps	P13439	5	4	1	9.05291e+06	2.53031e+06	10848.1
Wwp1	Q8BZZ3	5	3	2	9.0362e+06	3.55968e+06	1.60957e+07
Lamtor1	Q9CQ22	2	1	1	9.02151e+06	329347	1.12313e+07
Sec22b	O08547	2	2	2	8.97802e+06	7.02628e+06	1.18998e+07
Khsrp	Q3U0V1	2	2	1	8.95417e+06	1.80385e+07	4.71004e+06
Btk	P35991	3	2	2	8.93668e+06	2.79181e+06	20065355
Ywhaq	P68254	6	6	3	8.91513e+06	2.04881e+07	1.20587e+08
Sh3glb1	Q9JK48	3	3	3	8.90808e+06	3.89572e+06	1.20427e+07
Ifi205b	Q08619	2	2	1	8.88565e+06	5.29591e+06	11157.8
Cbr1	P48758	2	1	1	8.81303e+06	3.87093e+06	2.26914e+06
Psmb2	Q9R1P3	2	2	2	8.76338e+06	1.82683e+06	4.589e+06
Coro2a	Q8C0P5	3	4	1	8.75202e+06	4.21903e+06	3023.57
Vps41	NA	4	2	1	8.73621e+06	1.20918e+06	470592
Etfb	Q9DCW4	4	4	3	8.73269e+06	6.44237e+06	1.55086e+08
Slc29a1	Q9JIM1	2	1	1	8.6416e+06	6.03713e+06	4.40154e+07
Hdlbp	Q8VDJ3	3	4	3	8.61071e+06	8.94139e+06	3.28778e+07
Npc1	O35604	2	2	1	8.57561e+06	4.9672e+06	7.61841e+06
Eif5b	Q05D44	4	4	4	8.38674e+06	5.13196e+06	5.00619e+07
Stk38	Q91VJ4	2	2	0	8.36082e+06	2.17826e+06	0
Cd2ap	NA	2	1	0	8.35778e+06	1.43852e+06	0
Golga7	Q91W53	2	2	2	8.34555e+06	1.39664e+07	2.55673e+08
Eif3m	Q99JX4	2	1	1	8.31601e+06	518584	1.35058e+07
Rps12	P63323	2	2	0	8.28138e+06	2.55116e+06	0
Arrb2	Q91YI4	2	2	2	8.261e+06	1.91047e+07	1.52943e+07
Hsph1	Q61699	2	2	1	8.2462e+06	3.75679e+06	50457.4
Chmp2b	Q8BJF9	3	3	1	8.23256e+06	1.69579e+06	4.07673e+06
Eea1	Q8BL66	2	2	0	8.22918e+06	5.95735e+06	0
Bpgm	P15327	4	3	1	8.22363e+06	1.78647e+06	508259
Hvcn1	Q3U2S8	2	1	1	8.22046e+06	4.1139e+06	2.80418e+06
Prkacb	P68181	2	2	1	8.18612e+06	702311	1.2749e+06
Adrbk1	Q99MK8	2	3	2	8.15945e+06	2.22496e+06	1.67218e+06
Eif2s3x	Q9Z0N1	4	3	2	8.15493e+06	3.18712e+06	25218.9
Tufm	Q8BFR5	3	3	2	8.12558e+06	6.48403e+07	1.14611e+07
Gla	P51569	2	2	1	8.10875e+06	5.31148e+06	1.43059e+07
Rab7b	Q8VEA8	2	2	1	8.08101e+06	421125	451348
Tbc1d15	Q9CXF4	3	2	2	8.07304e+06	4.20859e+06	339526
Ddx46	Q569Z5	3	3	3	8.05912e+06	4.70697e+06	4.20187e+07
Ola1	Q9CZ30	3	1	1	8.00188e+06	1.47235e+06	3.24342e+06
Nop58	Q6DFW4	3	2	1	7.97319e+06	2.0899e+06	12764.1
Pdia6	Q922R8	4	5	4	7.97066e+06	7.63076e+06	3.1293e+07
Mob1b	Q8BPB0	2	3	2	7.96675e+06	1.92174e+07	3.66312e+06
Rpl12	P35979	2	2	0	7.95911e+06	8.5169e+06	0
Tgoln1	NA	2	1	1	7.92898e+06	345582	2.76786e+06
Gng5	Q80SZ7	1	1	2	7.92602e+06	7.77282e+06	1.16756e+07
Arhgef1	Q61210	5	4	3	7.92187e+06	2.06165e+07	1.14334e+08
Nt5c	Q9JM14	2	2	2	7.91046e+06	3.0727e+06	1.06496e+06
Pld4	Q8BG07	4	4	3	7.90966e+06	9.34164e+06	2.98722e+06
Tec	NA	2	1	2	7.88198e+06	341892	1.36709e+08
Psmb9	P28076	2	2	2	7.86204e+06	1.19559e+06	1.94925e+07
Sypl1	O09117	2	1	2	7.84728e+06	1.09604e+06	7.90162e+06
Dcxr	Q91X52	2	2	1	7.8215e+06	5.94942e+06	2.11054e+06
Pafah1b2	Q61206	2	2	1	7.76108e+06	1.26426e+06	1.41174e+08
Gdi1	P50396	2	2	1	7.75204e+06	1.00243e+07	491479
Prps1	Q9D7G0	2	0	2	7.69383e+06	0	7.04961e+06
Lypla2	Q9WTL7	2	2	2	7.59041e+06	3.12046e+06	1.41114e+06
Napa	Q9DB05	3	3	4	7.58742e+06	2.94968e+06	5.82614e+07
Serpinb1a	Q9D154	2	1	1	7.53438e+06	59367.4	1.77434e+06
Erp29	P57759	2	2	2	7.50155e+06	4.19012e+06	4.52245e+07
Npepl1	Q6NSR8	4	2	0	7.49574e+06	119939	0
Oas1a	P11928	2	2	2	7.49293e+06	1.7224e+06	9.86335e+07
Trappc12	Q8K2L8	4	3	2	7.46355e+06	1.92162e+06	8.75788e+06
Dnase1l1	Q9D7J6	2	1	1	7.44972e+06	2.07278e+06	4.41203e+06
Myct1	Q8R411	2	2	0	7.36967e+06	571077	0
Dazap1	Q9JII5	3	3	3	7.34364e+06	8.81614e+06	2.68488e+07
Ptpra	P18052	3	2	3	7.29373e+06	2.09392e+06	5.6568e+07
Uprt	B1AVZ0	2	2	2	7.21995e+06	3.38146e+06	5.17773e+06
Asl	Q91YI0	4	3	1	7.21795e+06	6.61393e+06	155425
Dynll1	P63168	2	2	0	7.15722e+06	436234	0
Copb1	Q9JIF7	3	3	3	7.1093e+06	2.23211e+06	2.71439e+07
Ube2l3	P68037	2	2	2	7.10103e+06	39994.9	6.98904e+06
Pef1	Q8BFY6	2	2	2	7.09843e+06	366686	1.81354e+06
Ppp3ca	P63328	2	2	2	7.07185e+06	4.65662e+06	6.92044e+06
Tpd52	Q62393	3	3	3	7.04524e+06	7.01318e+06	2.28155e+07
Gba	P17439	4	5	2	7.04033e+06	1.60094e+07	1.07045e+06
Stam	P70297	3	3	2	7.03892e+06	4.1232e+06	1.44629e+06
Nmt1	O70310	5	6	4	7.03864e+06	1.29624e+07	3.21358e+06
Cab39	Q06138	2	1	1	7.03841e+06	21994.3	681832
Dnajc7	Q9QYI3	2	2	2	7.0328e+06	4.34721e+06	1.04809e+06
Mtap	Q9CQ65	2	2	2	6.97522e+06	2.32457e+06	295092
U2surp	Q6NV83	4	4	2	6.91139e+06	4.03736e+06	644724
Ufd1l	P70362	3	4	3	6.89875e+06	1.04074e+07	3.48897e+06
Rbm39	Q8VH51	3	3	3	6.88752e+06	2.15253e+06	3.64394e+06
Tlr13	Q6R5N8	3	4	1	6.82035e+06	5.61368e+06	1.57701e+06
Vps18	Q8R307	4	4	3	6.77617e+06	9.06602e+06	2136208232
Eif2s1	Q6ZWX6	2	2	2	6.76349e+06	4.98746e+06	3.82752e+06
Usp14	Q9JMA1	2	2	2	6.75432e+06	3.71506e+06	1.78082e+06
Sh3bgrl	Q9JJU8	2	1	1	6.70629e+06	60015.2	785069
Ccar2	Q8VDP4	3	3	3	6.69487e+06	3.53613e+06	6.30058e+07
Cd81	P35762	2	1	3	6.68513e+06	115003	3.21576e+07
Khdrbs1	Q60749	3	3	0	6.65082e+06	3.69915e+06	0
Yipf3	Q3UDR8	2	2	1	6.6364e+06	2.86449e+06	1.54666e+06
Hdac1	O09106	2	2	0	6.53825e+06	2.80174e+06	0
Hspa13	Q8BM72	3	2	2	6.53625e+06	8.84003e+06	1.8428e+06
Cux1	P53564	2	2	2	6.51633e+06	5.37942e+06	4.60604e+07
Fuca1	Q99LJ1	2	2	2	6.47224e+06	3.22964e+06	1.08567e+06
Aars	Q8BGQ7	2	2	1	6.47102e+06	3.55873e+06	4.68014e+06
Klc1	O88447	4	4	2	6.42414e+06	7.29444e+06	492886
Pnkp	Q9JLV6	5	4	3	6.39443e+06	3.26084e+06	523647
Kars	Q99MN1	6	6	3	6.39016e+06	1.00051e+08	2.18935e+06
Xpo1	Q6P5F9	4	3	2	6.31614e+06	1.63089e+07	1.34907e+06
Lilrb4	Q64281	3	2	2	6.28441e+06	3.71287e+06	6.85605e+07
Vti1b	O88384	2	2	2	6.27307e+06	2.93972e+06	3.32052e+07
Oxsr1	Q6P9R2	3	2	0	6.25655e+06	2.21905e+06	0
Angpt2	NA	4	1	4	6.21238e+06	307310	1.33625e+07
Txnrd1	Q9JMH6	4	3	3	6.20623e+06	1.90485e+06	1.8071e+06
2016-09-09	Q80UG5	3	3	2	6.20616e+06	5.82171e+06	1.0888e+07
H2afv	Q3THW5	1	0	2	6.19329e+06	0	548940
Top2b	Q64511	3	3	1	6.18322e+06	4.08591e+06	132576
Rap2a	Q80ZJ1	2	0	1	6.17158e+06	0	132073
Dctn1	O08788	3	3	2	6.12281e+06	3.12271e+06	8.66386e+06
Ywhab	Q9CQV8	2	2	2	6.05758e+06	8.11191e+06	2.93887e+06
Psmb10	O35955	2	2	2	6.03357e+06	2.62971e+06	4.15513e+07
Tars	Q9D0R2	2	2	2	5.96065e+06	4.70906e+06	1.02237e+06
Glo1	Q9CPU0	2	1	1	5.95347e+06	1.07437e+06	781560
P2rx7	Q9Z1M0	2	1	1	5.90127e+06	1.20168e+06	2.21454e+07
Ubash3b	Q8BGG7	2	2	2	5.87756e+06	1.52813e+06	941757
Rragc	Q99K70	2	2	1	5.8759e+06	5.65276e+06	4.81003e+06
Alox12	P39655	3	2	2	5.87382e+06	885767	32310
Serbp1	Q9CY58	2	2	1	5.84175e+06	6.68581e+06	4.2603e+07
Rab5a	Q9CQD1	1	1	2	5.83405e+06	333027	3.41036e+07
Tsta3	P23591	2	2	1	5.76633e+06	2.70709e+06	5.33372e+06
Scfd1	Q8BRF7	3	2	1	5.7387e+06	5.96197e+06	2.17305e+06
Ptbp3	Q8BHD7	2	2	1	5.72938e+06	2.61903e+06	2.03459e+06
Mybbp1a	Q7TPV4	6	6	1	5.72557e+06	6.63943e+06	5.32321e+07
Mecp2	Q9Z2D6	2	2	1	5.71217e+06	3.30303e+06	2.44211e+07
Sgpl1	Q8R0X7	4	4	2	5.69566e+06	7.07348e+06	971321
Vps16	Q920Q4	2	1	1	5.67992e+06	3.2e+06	799429
Arf5	P84084	2	2	2	5.62176e+06	464915	1.55204e+07
Golim4	NA	2	2	2	5.62125e+06	1.42334e+06	1.27473e+06
Ap3s1	Q9DCR2	2	1	1	5.59113e+06	5.13578e+06	2.23937e+07
Atp6v1g1	Q9CR51	2	3	3	5.55758e+06	3.16868e+07	5.5047e+07
Map2k1	P31938	2	1	1	5.52131e+06	62704.3	4.25184e+06
Fscn1	Q61553	3	1	3	5.50289e+06	1.25326e+06	6.28647e+06
Gbp2	Q9Z0E6	3	3	2	5.43844e+06	3.67761e+06	119064
Wipf1	Q8K1I7	2	3	1	5.35142e+06	1.09845e+07	1.38335e+07
Eif5	P59325	3	3	1	5.31896e+06	2.71546e+06	630291
Rufy1	Q8BIJ7	2	2	2	5.3172e+06	1.53504e+06	2.41971e+07
Atl3	Q91YH5	2	2	0	5.28677e+06	2.09373e+06	0
Galk2	Q68FH4	3	2	1	5.28517e+06	5.04572e+06	933203
Vac14	Q80WQ2	2	1	1	5.25214e+06	432352	2.24056e+07
Arap1	Q4LDD4	4	4	3	5.1256e+06	6.48962e+06	3.33623e+07
Aldh1a1	P24549	2	2	0	5.09708e+06	2.85155e+06	0
Tomm34	Q9CYG7	2	2	2	5.08827e+06	2.30756e+06	2.79836e+07
Sh3pxd2b	A2AAY5	2	1	2	5.06126e+06	279232	6.61209e+06
Olfm4	Q3UZZ4	2	3	3	5.0453e+06	1.94584e+06	1.76957e+07
Dhx58	Q99J87	4	2	1	5.03785e+06	1.47264e+07	39462.8
Snx6	Q6P8X1	1	1	2	5.03049e+06	1.76161e+06	2.71729e+06
Srrm2	Q8BTI8	2	2	1	5.01259e+06	1.01098e+07	8.07738e+06
FAM120A	Q6A0A9	2	1	0	5.00768e+06	955518	0
Rps15a	P62245	1	1	2	4.98793e+06	1.78133e+06	2.6807e+07
Erbb2ip	Q80TH2	2	1	1	4.95629e+06	924660	5783.39
Basp1	Q91XV3	3	2	2	4.93655e+06	515296	1.12253e+07
Blmh	Q8R016	2	2	1	4.92191e+06	5.32449e+06	317391
Prkcb	P68404	3	4	2	4.89565e+06	1.22885e+07	7.71588e+06
Gmppb	Q8BTZ7	3	3	2	4.88733e+06	7.12874e+06	7.10453e+06
Dock10	Q8BZN6	2	2	1	4.85371e+06	1.71298e+06	1.59125e+07
Hnrnpll	Q921F4	4	4	1	4.84844e+06	3.62843e+06	212056
Oas3	Q8VI93	2	2	0	4.82587e+06	3.92135e+06	0
Htra1	Q9R118	3	3	2	4.82507e+06	1.97308e+06	1.54524e+07
Snx27	Q3UHD6	3	3	2	4.82174e+06	4.52453e+06	2.11595e+06
Prkag1	NA	3	3	2	4.78241e+06	2.86976e+06	1.95671e+07
Ifit3	Q64345	2	2	2	4.73317e+06	1.43616e+06	1.37655e+06
Hspe1	Q64433	2	1	1	4.68774e+06	140547	6.8897e+06
Ddah2	Q99LD8	2	3	4	4.59784e+06	6.66849e+06	1.52119e+07
Exoc4	O35382	3	3	2	4.50909e+06	3.08935e+06	995992
Ext1	NA	2	2	2	4.49975e+06	2.38374e+06	2.53726e+07
Rps6ka1	NA	3	0	1	4.47827e+06	0	223521
Pcolce	Q61398	2	3	4	4.39097e+06	8.44649e+06	5.7022e+07
Rgs10	Q9CQE5	2	2	2	4.37065e+06	2.73959e+06	6.03467e+06
Tom1	O88746	4	3	2	4.32449e+06	2.39459e+06	4.31344e+06
Acaa1a	Q921H8	2	2	0	4.31897e+06	1.34617e+06	0
Hsd17b12	O70503	2	3	2	4.27368e+06	5.1527e+06	1.94193e+07
Gpc1	NA	2	1	2	4.24111e+06	515432	5.7062e+06
Ppm1h	Q3UYC0	3	3	3	4.21699e+06	1.64652e+06	696563
Dennd4c	A6H8H2	3	2	2	4.18077e+06	1.48642e+06	5.72636e+06
Tmem30a	Q8VEK0	2	2	1	4.12361e+06	4.18748e+06	1.66122e+07
Fmnl1	Q9JL26	2	2	0	4.11931e+06	2.77788e+06	0
Irf5	P56477	3	3	1	4.09259e+06	2.24555e+06	43426.5
Tmem206	Q9D771	2	2	1	4.07678e+06	625499	1.00835e+06
Cmklr1	P97468	2	2	1	4.0646e+06	5.43841e+06	3.22624e+06
Stx8	O88983	3	3	3	3.96326e+06	2.21387e+06	9.37584e+06
Fcgrt	Q61559	2	2	2	3.94231e+06	3.80884e+06	1.32186e+06
Tmem168	Q91VX9	2	1	2	3.93106e+06	8108.24	4.8932e+06
Ddi2	A2ADY9	2	2	1	3.88784e+06	3.22445e+06	1.91495e+07
Srrt	Q99MR6	2	3	2	3.85707e+06	5.1043e+06	1.26143e+06
Fubp1	Q91WJ8	3	3	0	3.85421e+06	5.93273e+06	0
Ptpre	P49446	2	3	1	3.82118e+06	2.21155e+06	14429.5
Ppp1r18	Q8BQ30	3	2	2	3.75457e+06	4.41994e+06	3.13509e+06
Fes	NA	2	2	1	3.74652e+06	1.51028e+06	8.72392e+06
Psmd10	Q9Z2X2	2	1	1	3.66027e+06	1.72553e+06	317344
Src	P05480	2	2	1	3.6446e+06	1.30203e+06	654222
Ddx58	Q6Q899	2	2	0	3.62482e+06	1.1364e+06	0
Trpv2	Q9WTR1	2	2	2	3.61563e+06	616564	1.86047e+07
Serpinh1	P19324	2	1	1	3.59722e+06	53740.2	8.7958e+06
Rad23b	P54728	2	2	1	3.55717e+06	1.46746e+06	13061.7
Exoc2	Q9D4H1	2	2	1	3.46013e+06	3.06666e+06	1.43313e+07
Loxl1	P97873	1	1	2	3.45454e+06	6.48628e+06	1.93044e+07
Farsb	Q9WUA2	3	2	0	3.44709e+06	4.76731e+06	0
Uba6	Q8C7R4	2	1	2	3.36027e+06	500941	3.04906e+06
Acot7	Q91V12	2	1	1	3.31774e+06	180790	6.54283e+06
Stat6	P52633	2	2	1	3.28149e+06	1.85613e+06	3.15347e+06
Suclg1	Q9WUM5	1	2	1	3.24739e+06	4.83217e+06	6.04955e+06
Hspa9	P38647	2	2	3	3.22741e+06	3.78259e+06	5.84801e+06
Man1a2	P39098	2	2	1	3.18139e+06	405118	1.62991e+07
Tnfaip3	NA	2	2	2	3.17136e+06	1.17004e+06	2.89687e+07
Mmp8	O70138	2	2	2	3.13518e+06	661258	15236.5
Ehd2	Q8BH64	2	1	2	3.13316e+06	1.18696e+06	1.26128e+07
Bub3	Q9WVA3	2	2	2	3.13309e+06	2.11741e+06	2.04382e+07
Gspt1	Q8R050	2	1	0	3.05805e+06	958285	0
Isyna1	Q9JHU9	3	3	3	3.04485e+06	1.06148e+06	627039
Tnc	Q80YX1	3	2	5	3.00825e+06	193001	1.41478e+08
Eif2s2	Q99L45	2	1	1	2.96432e+06	78641.1	327417
Dpp3	Q99KK7	2	2	1	2.95642e+06	647433	18899.3
Ptgr1	Q91YR9	2	1	0	2.92792e+06	7738.38	0
Smarca4	Q3TKT4	3	3	1	2.92622e+06	1.00398e+07	274704
Armc8	Q9DBR3	2	3	0	2.92602e+06	4.24939e+06	0
Prkar2b	P31324	2	2	0	2.87858e+06	1.59104e+06	0
Gxylt1	Q3UHH8	2	1	0	2.87728e+06	1.36094e+06	0
Dcn	NA	2	2	1	2.71826e+06	798806	1.07201e+07
Rab11fip5	Q8R361	2	3	2	2.69555e+06	3.30987e+06	1.15609e+07
Chmp5	NA	2	0	3	2.66393e+06	0	2.14876e+07
Hnrnpa0	Q9CX86	2	2	1	2.63388e+06	2.66821e+06	4.54494e+07
Trappc13	Q3TIR1	2	1	2	2.60464e+06	1.39728e+06	673806
Hnrnph2	P70333	2	1	0	2.58647e+06	113702	0
Mmp13	P33435	4	3	3	2.53286e+06	1.45093e+06	5.23004e+06
Prpf6	Q91YR7	2	1	1	2.50385e+06	1.31137e+06	357720
Unc93b1	Q8VCW4	2	3	2	2.48098e+06	6.0469e+06	2.47301e+07
Aco2	Q99KI0	2	2	1	2.42559e+06	1.61509e+06	2.81545e+06
Sec31a	Q3UPL0	2	2	0	2.41418e+06	1.80531e+06	0
Rasgrp2	Q9QUG9	2	2	0	2.40396e+06	546071	0
Glud1	P26443	2	2	1	2.40023e+06	875542	71582.6
Wwp2	NA	2	1	1	2.34903e+06	422412	1.16932e+06
Golga2	NA	2	2	1	2.3261e+06	1.42508e+06	2.10125e+07
Uxs1	Q91XL3	2	1	0	2.285e+06	464984	0
Gyg1	Q9R062	1	2	2	2.23766e+06	2.30081e+06	3.00393e+07
Celf2	Q9Z0H4	3	3	2	2.22979e+06	3.49792e+06	6.23532e+06
Nid2	O88322	2	1	4	2.22289e+06	429747	4.39462e+07
Rnf149	Q3U2C5	2	1	1	2.15382e+06	92954.8	354874
Stat3	P42227	2	1	1	2.08203e+06	1.58215e+06	1.63244e+07
Flii	Q9JJ28	2	2	2	1.9953e+06	1.86112e+06	2.48783e+07
Vps45	P97390	3	2	0	1.96504e+06	988900	0
Ipo5	Q8BKC5	2	0	1	1.95435e+06	0	3.39494e+06
Hprt1	P00493	2	2	3	1.93814e+06	2.67327e+06	1.27045e+08
Eps15l1	Q60902	2	2	0	1.90059e+06	3.35203e+06	0
Elp3	Q9CZX0	2	2	2	1.88145e+06	1.02573e+06	213889
Kif3b	NA	1	2	2	1.85171e+06	1.31376e+07	59260.6
Slc7a5	Q9Z127	2	1	2	1.78339e+06	230623	2.12095e+07
Eif4g2	Q62448	2	1	1	1.77836e+06	795168	1.28241e+06
Commd9	Q8K2Q0	2	1	1	1.77722e+06	18682.3	138743
Trem2	Q99NH8	2	0	2	1.7719e+06	0	7.31004e+06
Suv39h1	NA	1	2	0	1.70491e+06	9.89082e+07	0
Synj1	Q8CHC4	2	2	1	1.58208e+06	2.75685e+06	3.46563e+07
Dsg1b	Q7TSF1	2	3	3	1.58147e+06	8.97672e+06	306938109
Wdr91	Q7TMQ7	2	1	2	1.57227e+06	2.15956e+06	193436
Grk6	O70293	2	2	0	1.56534e+06	787716	0
Rps15	P62843	2	1	1	1.54431e+06	297106	1.08767e+06
Lrrc47	Q505F5	1	2	0	1.53635e+06	3.15418e+06	0
Aacs	Q9D2R0	2	2	0	1.49328e+06	3.74075e+06	0
Rufy3	Q9D394	2	2	0	1.4765e+06	3.23932e+06	0
Ppp2r5c	Q60996	2	1	1	1.39523e+06	2.15824e+06	212206
Csf1r	P09581	1	1	2	1.26985e+06	1.09191e+07	4.09511e+06
Plin3	Q9DBG5	2	1	1	1.22361e+06	167318	2.84082e+06
Slc15a3	Q8BPX9	2	0	1	1.18381e+06	0	1.22598e+06
Tnfaip2	NA	2	2	1	1.08377e+06	737225	21536.8
Oasl1	Q8VI94	1	2	1	1.04875e+06	1.99829e+06	5.72304e+06
Snrnp200	Q6P4T2	1	5	3	1.00876e+06	1.04053e+07	957256
Polr2b	NA	1	2	1	935824	1.42946e+08	7.41687e+07
Ccdc22	Q9JIG7	3	3	3	880814	1.07313e+06	4.31502e+06
Smarce1	O54941	2	2	0	847191	1.47149e+06	0
Ptx3	NA	2	2	2	774420	1.80778e+07	5.4273e+08
Aebp1	Q640N1	1	1	2	658917	1.39749e+06	3.176e+07
Flnc	Q8VHX6	1	2	2	501566	1.1253e+07	4.47411e+07
Smarcc2	Q6PDG5	2	2	1	491072	1.35019e+06	997799
Dctn2	Q99KJ8	2	1	1	453426	736931	1.99244e+06
Tapbp	Q9R233	1	2	1	450995	4.02762e+06	1.57055e+06
Kalrn	A2CG49	1	2	1	447307	6.5638e+06	4.70198e+06
Tmpo	Q61029	2	1	1	411442	3.70303e+06	41492
Dym	Q8CHY3	2	2	1	406041	706799	1.64561e+07
Myh14	NA	0	2	1	0	7.0759e+06	7922.67
Mapre1	Q61166	0	2	1	0	4.6479e+06	5.80177e+06
Tagln	P37804	0	1	2	0	1.04046e+06	9.30627e+07
Efnb1	P52795	0	1	2	0	203276	3.23976e+07
